1 **Pathogenic Mutations in the Kinesin-3 Motor KIF1A Diminish Force**  
2 **Generation and Movement Through Allosteric Mechanisms**  
3  
4  
5

6 Breane G. Budaitis<sup>1\*</sup>, Shashank Jariwala<sup>2,3\*</sup>, Lu Rao<sup>5\*</sup>, David Sept<sup>3#</sup>, Kristen J.  
7 Verhey<sup>1,4#</sup>, and Arne Gennerich<sup>5#</sup>.  
8  
9

10 \*equal contribution, authors listed alphabetically

11 #corresponding authors: [kjverhey@umich.edu](mailto:kjverhey@umich.edu), [dsept@umich.edu](mailto:dsept@umich.edu), and  
12 [arne.gennerich@einsteinmed.org](mailto:arne.gennerich@einsteinmed.org)  
13  
14

15 ORCID IDs: KJV 0000-0001-9329-4981

16 DS 0000-0003-3719-2483

17 AG 0000-0002-8346-5473  
18  
19

20 <sup>1</sup>Program in Cellular and Molecular Biology, University of Michigan, Ann Arbor, MI USA

21 <sup>2</sup>Department of Computational Medicine and Bioinformatics, University of Michigan, Ann Arbor,  
22 MI USA

23 <sup>3</sup>Department of Biomedical Engineering, University of Michigan, Ann Arbor, MI USA

24 <sup>4</sup>Department of Cell and Developmental Biology, University of Michigan, Ann Arbor, MI USA

25 <sup>5</sup>Department of Anatomy and Structural Biology and Gruss-Lipper Biophotonics Center, Albert  
26 Einstein College of Medicine, New York, NY USA  
27  
28  
29  
30  
31  
32  
33  
34  
35

36 Short Title: Force Generation by Kinesin-3 Motors

37 **ABSTRACT**

38 The kinesin-3 motor KIF1A functions in neurons where its fast and superprocessive motility is  
39 thought to be critical for long-distance transport. However, little is known about the force-  
40 generating properties of kinesin-3 motors. Using optical tweezers, we demonstrate that KIF1A  
41 and its *C. elegans* homolog UNC-104 undergo force-dependent detachments at ~3 pN and then  
42 rapidly reattach to the microtubule to resume motion, resulting in a sawtooth pattern of clustered  
43 force generation events that is unique among the kinesin superfamily. Whereas UNC-104  
44 motors stall before detaching, KIF1A motors do not. To examine the mechanism of KIF1A force  
45 generation, we introduced mutations linked to human neurodevelopmental disorders, V8M and  
46 Y89D, based on their location in structural elements required for force generation in kinesin-1.  
47 Molecular dynamics simulations predict that the V8M and Y89D mutations impair docking of the  
48 N-terminal ( $\beta$ 9) or C-terminal ( $\beta$ 10) portions of the neck linker, respectively, to the KIF1A motor  
49 domain. Indeed, both mutations dramatically impair force generation of KIF1A but not the  
50 motor's ability to rapidly reattach to the microtubule track. Homodimeric and heterodimeric  
51 mutant motors also display decreased velocities, run lengths, and landing rates and  
52 homodimeric Y89D motors exhibit a higher frequency of non-productive, diffusive events along  
53 the microtubule. In cells, cargo transport by the mutant motors is delayed. Our work  
54 demonstrates the importance of the neck linker in the force generation of kinesin-3 motors and  
55 advances our understanding of how mutations in the kinesin motor domain can manifest in  
56 disease.

57  
58 (242 words)

## 59 INTRODUCTION

60 The cytoskeleton of eukaryotic cells forms the structural framework for fundamental  
61 cellular processes including cell division, cell motility, intracellular trafficking, and cilia function. In  
62 most of these processes, the functional output of the microtubule (MT) cytoskeleton depends on  
63 a family of molecular motor proteins called kinesins. Kinesins are defined by the presence of a  
64 globular motor domain that contains sequences for binding ATP and MTs. Kinesins involved in  
65 intracellular trafficking use the energy of ATP hydrolysis for processive motility and force  
66 generation along the MT surface.

67 The kinesin-3 family is one of the largest among the kinesin superfamily and its members  
68 are primarily involved in the anterograde transport of cargoes toward the plus ends of MTs in the  
69 periphery of the cell [reviewed in (1-3)]. Genetic and microscopy studies have implicated the  
70 kinesin-3 motor KIF1A, and its orthologs, in the transport of synaptic vesicle precursors (SVPs)  
71 and dense core vesicles (DCVs) to the axon terminal (4-9). A number of inherited variants and *de*  
72 *novo* mutations have been identified in human *KIF1A* from clinical studies. These mutations have  
73 been linked to neurodevelopmental and neurodegenerative disorders including spastic  
74 paraplegias, encephalopathies, intellectual disability, autism, and sensory neuropathies (3, 10-  
75 15). For KIF1A-associated neurological disorder (KAND), the mutations span the entirety of the  
76 KIF1A protein sequence; the majority are located within the kinesin motor domain (aa 1-369) and  
77 are thus predicted to affect the motor's motility properties whereas mutations located outside the  
78 motor domain are likely involved in mediating cargo binding, dimerization, and/or autoinhibition  
79 [reviewed by (3)].

80 Recent studies have shown that kinesin-3 proteins have striking motility properties as they  
81 are exceptionally fast and superprocessive and have dramatically higher MT-landing rates (ability  
82 to productively engage with MTs) than other kinesin motors (16-18). However, little is known about  
83 the ability of kinesin-3 motors to generate and sustain force. A general understanding of how  
84 kinesin motors generate force is largely based on studies of kinesin-1 (19-24), the founding  
85 member of the kinesin superfamily. Force generation requires the neck linker (NL), a flexible  
86 structural element that immediately follows the kinesin motor domain, which docks along the  
87 surface of the motor domain in response to ATP binding (25-28). NL docking in kinesin-1 occurs  
88 in two steps. First is the "zippering" step in which the first half of the NL ( $\beta 9$ ) interacts with  $\beta 0$  [the  
89 cover strand (CS)] of the core motor domain to generate a short  $\beta$ -sheet termed the cover-neck  
90 bundle (CNB) (29). Although formation of the CNB has been observed in structures of motor  
91 domains from kinesin-3, kinesin-5, and kinesin-6 members (30-35), its mechanical role in force  
92 generation has only been tested in kinesin-1 motors (27, 36). Second is the "latching" step where  
93 the second half of the NL ( $\beta 10$ ) interacts with surface residues of  $\alpha 1$ - $\beta 3$  and  $\beta 7$  of the core motor  
94 domain and is latched in place via a conserved asparagine residue (the N-latch) (27, 29, 36). A  
95 role for NL latching in force generation was recently demonstrated for kinesin-1 (36). Crystal  
96 structures of kinesin-3 motor domains suggest that close contact between  $\alpha 1$ - $\beta 3$  and the NL may  
97 play a role in force generation for this family as well (30, 37, 38).

98 Despite these structural similarities, several studies have suggested that the force-  
99 generating properties of kinesin-3 motors may be different than that of other kinesin motors. First,  
100 when forced to compete with kinesin-1, KIF1A gives up easily, suggesting that it has a high load-  
101 dependent off-rate from the MT (39-41). Second, the *C. elegans* homolog UNC-104 displays a  
102 rapid decrease in velocity and increase in MT-dissociation rate under load applied in an optical  
103 tweezers assays (42). Here, we determine the force-generating properties of two members of the  
104 kinesin-3 family, the mammalian KIF1A motor and its homolog UNC-104, present in mammalian  
105 cell lysates and purified from *E. coli* bacteria. In a single-molecule optical tweezers assay, we find  
106 that UNC-104 motors stall and then undergo detachment at an average force of 3 pN. KIF1A  
107 motors also detach at an average force of 2.7 pN but readily detach from the MT track rather than

108 stall. Strikingly, both UNC-104 and KIF1A motors quickly reattach to the MT and resume force  
109 generation, leading to a characteristic saw-tooth force-generation pattern that is distinct from other  
110 kinesin motors to date.

111 To determine whether NL docking plays a critical role in force generation by KIF1A, we  
112 introduced disease-associated mutations based on their a) location in structural elements  
113 predicted to be critical for NL docking and b) mild disease phenotypes that suggest an impairment  
114 rather than loss of KIF1A protein activity. V8M and Y89D are *de novo* mutations that manifest in  
115 an autosomal dominant manner to cause pure hereditary spastic paraplegia with childhood onset  
116 [OMIM #610357, (43)] and mental retardation, autosomal dominant 9 [OMIM #614255, (44)],  
117 respectively. The V8M mutation is located in  $\beta 1$ , immediately following the CS, and may therefore  
118 prevent CNB formation. Notably, a valine in this position is highly conserved across the kinesin  
119 superfamily [Fig S1, (45)]. The Y89D mutation is located at the  $\alpha 1$ - $\beta 3$  intersection and an aromatic  
120 residue (tyrosine or phenylalanine) at this position is highly conserved across the kinesin  
121 superfamily [Fig S1, (36, 45)]. To provide insights into the molecular effects of these mutations,  
122 we performed molecular dynamics (MD) simulations, which predicted attenuating effects of both  
123 mutations on the motility and force generation of KIF1A. In optical tweezers assays, both  
124 mutations resulted in a significant decrease in force output but had no effect on the motor's ability  
125 to rapidly reengage with the MT track. In single-molecule fluorescence assays, both mutations  
126 resulted in a decrease in speed, processivity, and landing rate on MTs under unloaded conditions.  
127 In addition, KIF1A motors containing the Y89D mutation displayed an increase in diffusive events.  
128 Finally, we used a peroxisome-targeting assay to probe the ability of WT and mutant motors to  
129 work in teams to drive organelle transport in cells. We found that mutant motors show a significant  
130 delay in organelle transport. Collectively, our results support the proposed role for the NL as a  
131 mechanical element important for kinesin motors to transport against load. Our results also  
132 provide insight into how KAND-associated mutations affect KIF1A transport in cells.

133

134

## 135 RESULTS

136

### 137 ***KIF1A and UNC-104 motors exhibit rapid force-dependent detachments and reattachments*** 138 ***to MTs***

139 To examine the force output of kinesin-3 motors, we used optical tweezers with  
140 nanometer-level spatial resolution (46, 47) to probe the force response of rat KIF1A and *C.*  
141 *elegans* UNC-104. As a control, we also performed experiments on the widely-studied rat kinesin-  
142 1 KIF5C. Biotinylated KIF5C(1-560)-AviTag™ motors in COS-7 cell lysates (KIF5C<sup>C</sup>) bound to  
143 streptavidin-coated trapping beads displayed typical force-generating events but frequently  
144 detached under load before reaching a stall plateau. Stalling of KIF5C<sup>C</sup> motors occurred at an  
145 average force of ~5 pN (motor stalling for  $\geq 200$  ms) (Fig 1A&C), however, the average force at  
146 which KIF5C<sup>C</sup> detaches from the MT under load is smaller (4.4 pN; Fig 1D, Table 1), consistent  
147 with previous studies (19, 24, 27, 36).

148 For UNC-104, we purified a truncated [UNC-104(1-389)] and biotinylated version from *E.*  
149 *coli* cells (UNC-104<sup>E</sup>) (42). Individual UNC-104<sup>E</sup> motors were processive in the absence of load  
150 (Fig S2A), and frequently detached under load before reaching a stall plateau (Fig 1B). UNC-104<sup>E</sup>  
151 motors stalled ( $\geq 10$  ms criterion) at  $3 \pm 0.6$  pN ( $\pm$ SEM) (Fig 1C) but frequently detached before  
152 stalling at an average detachment force of 2.6 pN (Fig 1D, Table 1). Interestingly, unlike kinesin-  
153 1 KIF5C<sup>C</sup>, UNC-104<sup>E</sup> motors frequently reengaged with the MT track: UNC-104<sup>E</sup> produced  $5.0 \pm$   
154  $0.6$  events ( $\pm$ SEM) per MT encounter whereas KIF5C<sup>C</sup> exhibited only  $1.2 \pm 0.1$  events (Fig 1G).

155 For KIF1A, we used a truncated version that is constitutively active [KIF1A(1-393)]  
156 followed by a leucine zipper (LZ) to ensure the motor is in a dimeric state (16), and compared the  
157 behavior of KIF1A(1-393)-LZ motors present in COS-7 cell lysates (KIF1A<sup>C</sup>) to those expressed  
158 and purified from *E. coli* bacteria (KIF1A<sup>E</sup>). Individual KIF1A motors underwent fast motility in the  
159 absence of load (Figs S2 and 6) but in contrast to KIF5C and UNC-104, KIF1A motors did not  
160 exhibit motor stalling; rather, KIF1A motors rapidly detached from the MT when subjected to force  
161 (Fig 1E&F). We measured an average detachment force of 2.7 pN for KIF1A motors expressed  
162 in mammalian or bacterial cells (Fig 1D, Table 1). Interestingly, KIF1A motors quickly rebound to  
163 the MT after detachment and moved forward again, presumably due to the motor's high on-rate  
164 towards MTs (48). These rapid detachment and reattachment cycles result in a "clustering" of  
165 force generation events (Fig 1E&F). The average number of rebinding events per MT encounter  
166 is even higher for KIF1A than UNC-104 at  $24 \pm 3$  ( $\pm$ SEM) events for KIF1A<sup>E</sup> and  $25 \pm 4$  events for  
167 KIF1A<sup>C</sup> (Fig 1G).

168

169 **Table 1. Single-molecule detachment forces**

| Kinesin motor        | COS-7 cell lysate | <i>E. coli</i> expressed |
|----------------------|-------------------|--------------------------|
| kinesin-1 KIF5C      | 4.4 [3.8, 4.9] pN | ND                       |
| kinesin-3 UNC-104    | ND                | 2.6 [2.2, 2.9] pN        |
| kinesin-3 KIF1A      | 2.7 [2.3, 3.0] pN | 2.7 [2.3, 3.1] pN        |
| kinesin-3 KIF1A-V8M  | 2.0 [1.7, 2.2] pN | 1.9 [1.7, 2.2] pN        |
| kinesin-3 KIF1A-Y89D | 1.0 [0.9, 1.2] pN | 1.0 [0.9, 1.2] pN        |

170 Data reported as Mean [quartiles]. ND, not determined.

171

### 172 ***KIF1A* disease variants are predicted to impact motor force generation**

173 We hypothesized that the mechanism of KIF1A force generation is similar to that of  
174 kinesin-1 and uses nucleotide-dependent conformational changes of the NL to facilitate force  
175 generation. To test this, we looked for KAND-associated mutations located in regions predicated  
176 to be critical for NL docking. We mapped KAND-associated mutations onto the protein sequence  
177 (Fig 2A, red lines) and structure (Fig 2B, red circles) of the KIF1A motor domain [PDB 4UY0,  
178 (30)]. The majority (21/31) of KAND-associated mutations cluster within functional elements  
179 critical for MT binding, nucleotide binding, or force generation (Fig 2A&B, Table 2). In particular,  
180 two *de novo* KAND-associated mutations, V8M and Y89D, are located in elements important for  
181 kinesin-1 motors to step against force (Fig 2C). To delineate the local and global effects of these  
182 mutations on the KIF1A motor domain, we performed all-atom MD simulations of WT or mutant  
183 motor domains interacting with the MT in their ATP-bound state [post-power stroke, PDB 4UXP,  
184 (30)]. Four replicate simulations of at least 200 ns each were carried out and analysis across  
185 replicate simulations was used to predict statistically significant differences in residue-residue  
186 distances between WT KIF1A and the KAND mutant motors ( $p < 10^{-5}$ , V8M Fig 3; Y89D Fig 4).

187 For the V8M mutation, the MD simulations predict local changes in residue-residue  
188 interactions important for NL-dependent motor stepping and force generation (Fig 3A,B,E).  
189 Enhanced interactions are observed between the initial residues of  $\beta$ 9 of the NL and the second  
190 residue (S6) of the CS (Fig 3A&B, red lines; Fig 3E, red box marked CS-NL), which may contribute  
191 to CNB formation and force output. However, reduced interactions are observed for the remainder  
192 of  $\beta$ 9 and elements that position it for NL docking. In particular, reduced interactions are observed  
193 between  $\beta$ 9 and residues of  $\alpha$ 4 that make up the docking pocket (Fig 3A&B, blue lines; Fig 3E,  
194 blue box marked  $\alpha$ 4-NL). Thus, the V8M mutation may position the CS such that it sterically

195 occludes the NL's access to the docking pocket. The MD simulations also predict reduced  
196 interactions between elements important for coordinating and hydrolyzing nucleotide (Fig 3C&D,  
197 blue lines; Fig 3E, boxes marked S1-PL and S2-S1). As closure of the switch regions is necessary  
198 for ATP hydrolysis (26, 49, 50), these results suggest that the V8M mutant motor may have  
199 problems coordinating and/or hydrolyzing ATP and therefore have a reduced velocity compared  
200 to WT motors.

201 For the Y89D mutation, the MD simulations predict more severe restrictions on NL docking  
202 and thus a greater impact on motor stepping and force generation. Specifically, the MD  
203 simulations reveal reduced interactions important for positioning  $\beta$ 9 of the NL in the  $\alpha$ 4-lined  
204 docking pocket (Fig 4A&B, blue lines; Fig 4E, blue box marked  $\alpha$ 4-NL) and for subsequent  
205 docking of  $\beta$ 10 along the core motor domain (Fig 4&B, blue lines; Fig 4E, blue boxes marked  
206  $\alpha$ 1/ $\beta$ 3-NL and L13/ $\beta$ 8-NL). In addition, the MD simulations revealed mixed effects of the Y89D  
207 mutation on interactions between elements in the nucleotide-binding pocket. There are enhanced  
208 interactions between elements important for gating and capture of nucleotide (Fig 4C&D, red  
209 lines; Fig 4E, red boxes marked S1- $\alpha$ 0) as well as reduced interactions between elements  
210 important for nucleotide hydrolysis and exchange (Fig 4C&D, blue lines; Fig 4E, blue boxes  
211 marked S2-PL and S2-S1) (26, 49-51). Therefore, these results suggest that although the mutant  
212 motor may have no restrictions on binding ATP, it may display a reduced ability to hydrolyze ATP  
213 and undergo processive motility.

214

215  
216

**Table 2. KAND-associated mutations that map to the KIF1A motor domain.**

| KIF1A functional region             | KAND-associated mutations                                                                                                        |
|-------------------------------------|----------------------------------------------------------------------------------------------------------------------------------|
| MT binding                          | $\alpha$ 4: L278P<br>Loop12: P305L and R307Q<br>$\alpha$ 5: R316W<br>$\alpha$ 6: R350G                                           |
| nucleotide binding and hydrolysis   | P Loop: T99M and 102S/D<br>Loop 9 (Switch 1): A202P, S215R/H, R216C, S217Y<br>Loop 11 (Switch 2): L249Q, E253K, R254P/W/Q, A255V |
| force generation and motor stepping | $\beta$ 1: V8M<br>$\alpha$ 1- $\beta$ 3: Y89D                                                                                    |

217

218

### 219 ***Impact of V8M and Y89D mutations on the force generation of homodimeric motors.***

220 To examine the effects of the V8M and Y89D mutations on the force output of the motors,  
221 we used optical tweezers and motors attached to beads under single-molecule conditions as done  
222 for the WT motor. Biotinylated KIF1A-AviTag motors containing the V8M or Y89D mutations were  
223 bound to streptavidin-coated trapping beads from lysates of COS-7 cells (KIF1A<sup>C</sup>-V8M/Y89D) or  
224 after purification from *E. coli* bacteria (KIF1A<sup>E</sup>-V8M/Y89D). Both mutant motors were sensitive to  
225 small opposing forces exerted by the trap. Similar to the WT motor, the V8M and Y89D motors  
226 detached from the MT before reaching a stall plateau (Fig 5A-D). However, both mutant motors  
227 displayed an impaired force output as their average detachment forces (1.9 and 1.0 pN,  
228 respectively) were significantly reduced (Fig 5E&F; Table 1) compared to WT KIF1A. The reduced  
229 force output of the mutant motors is consistent with our MD simulations that predict that the KAND  
230 mutations would impair docking of  $\beta$ 9 and/or  $\beta$ 10 of the NL to the core motor domain (Figs 3 and  
231 4). Interestingly, similar to the WT motor, the mutant motors quickly rebound to the MT after  
232 detaching (Fig 5A-D), resulting in a clustering of force-generating events.

### 233 **Impact of V8M and Y89D mutations on unloaded motility properties of homodimeric motors**

234 We next used fluorescence-based single-molecule motility assays to examine the  
235 behavior of WT or KAND mutant KIF1A motors under unloaded conditions. For this work, we used  
236 KIF1A(1-393)-LZ motors tagged with a HaloTag<sup>®</sup> (for fluorescent labeling with JF552 ligand) and  
237 a FLAG tag and present in COS-7 cell lysates (Fig 6). The motors were added to flow chambers  
238 containing polymerized MTs and their single-molecule motility properties were examined using  
239 total internal reflection fluorescence (TIRF) microscopy (52). As expected, the truncated,  
240 homodimeric WT motor displayed fast [ $2.1 \pm 0.1 \mu\text{m/s}$  (mean  $\pm$  SEM), Fig 6C] and super-  
241 processive ( $16.7 [10.2, 27.2] \mu\text{m}$  (median [25%, 75%]), Fig 6D) motility with a high landing rate of  
242  $0.22 \pm 0.01 \text{ events}\cdot\text{nm}^{-1}\cdot\text{nM}^{-1}\cdot\text{s}^{-1}$  (mean  $\pm$  SEM; Fig 6E, Table 3), consistent with previous work  
243 (18, 48). The homodimeric V8M mutant motors displayed a significant decrease in overall velocity  
244 ( $1.3 \pm 0.1 \mu\text{m/s}$ , Fig 6C), processivity ( $4.1 [2.1, 7.0] \mu\text{m}$ , Fig 6D), and landing rate ( $0.05 \pm 0.01$   
245  $\text{events}\cdot\text{nm}^{-1}\cdot\text{nM}^{-1}\cdot\text{s}^{-1}$ , Fig 6E) (Table 3). The reduced velocity of the V8M mutant motors is  
246 consistent with the MD simulations that predict allosteric effects on the nucleotide-binding pocket  
247 that result in reduced catalytic site closure and reduced ATP hydrolysis (Fig 3C-E).

248 The Y89D mutant motors also displayed a decrease in velocity ( $1.7 \pm 0.1 \mu\text{m/s}$ , Fig 6C),  
249 processivity ( $2.0 [1.2, 3.5] \mu\text{m}$ , Fig 6D), and landing rate ( $0.12 \pm 0.01 \text{ events}\cdot\text{nm}^{-1}\cdot\text{nM}^{-1}\cdot\text{s}^{-1}$ , Fig 6E)  
250 as compared to the WT motor (Fig 6C-E, Table 3). Further examination of the kymographs  
251 indicated two additional differences in the motility behavior of Y89D mutant motors. First, the  
252 tracks of Y89D motility were not smooth but rather the motors appeared to “wobble” or move  
253 sideways as they walked along the MT track (Fig 6B). Second, a large number of non-productive,  
254 diffusive events (net displacement along the MT  $< 200 \text{ nm}$ ) were observed (Fig 6A, white  
255 arrowheads). We quantified the percentage of diffusive events with a dwell time greater than 400  
256 ms for each motor (Fig 6F). The Y89D mutant motors displayed a greater percentage of diffusive  
257 events ( $18.5 \pm 1.2\%$  of binding events) than the WT or V8M motors ( $4.4 \pm 0.5\%$  and  $5.7 \pm 0.3\%$ ,  
258 respectively) (Fig 6F, Table 3) and the duration of the diffusive events was longer for the Y89D  
259 mutant motors ( $1.3 \pm 0.2 \text{ s}$ ) than for the WT or V8M mutant motors ( $0.81 \pm 0.01 \text{ s}$  and  $0.69 \pm 0.02$   
260 s, respectively, Fig 6G). The increase in diffusive events suggests that the Y89D mutant motor  
261 often engages in a weak MT-binding state.

262 To ensure that the changes in motility of the V8M and Y89D motors were due to direct  
263 effects on motor behavior rather than indirect alterations in the cell lysate context, we purified  
264 SNAP- and His-tagged homodimeric WT, V8M, and Y89D motors from *E. coli* bacteria. The  
265 purified recombinant WT motors displayed fast ( $2.5 \pm 0.2 \mu\text{m/s}$ , Fig S2B&C) and superprocessive  
266 ( $12.2 [6.7, 18.4] \mu\text{m}$ , Fig S2D) motility (Table 3). Similar to the effects observed for the mammalian-  
267 expressed mutant motors, the recombinant KIF1A-V8M<sup>E</sup> and KIF1A-Y89D<sup>E</sup> mutant motors were  
268 slower ( $1.3 \pm 0.1 \mu\text{m/s}$  and  $1.7 \pm 0.2 \mu\text{m/s}$ , respectively, Fig S2F&I) and displayed a reduced  
269 processivity ( $7.3 [4.4, 12.2] \mu\text{m}$  and  $6.3 [4.0, 7.0] \mu\text{m}$ , respectively, Fig S2F,I) as compared to the  
270 WT<sup>E</sup> motor (Table 3). Overall, we conclude that as homodimeric motors, the V8M motor shows a  
271 significant impairment in velocity and landing rate whereas the Y89D motor shows a significant  
272 impairment in processivity and in its ability to engage in processive rather than diffusive motility  
273 (Table 3).

274

275

276

277

278

279

280 **Table 3. Unloaded Single-Molecule Motility Properties**

| KIF1A motor            | velocity<br>( $\mu\text{m}/\text{sec}$ )* | run length<br>( $\mu\text{m}$ ) <sup>#</sup> | landing rate<br>(# events $\cdot$ s <sup>-1</sup> $\cdot$ nM <sup>-1</sup> $\cdot$ nm <sup>-1</sup> ) | % diffusive events<br>(diffusive / total events) |
|------------------------|-------------------------------------------|----------------------------------------------|-------------------------------------------------------------------------------------------------------|--------------------------------------------------|
| WT/WT <sup>C</sup>     | 2.1 $\pm$ 0.1                             | 16.7 [10.2,27.2]                             | 0.22 $\pm$ 0.01                                                                                       | 4.4 $\pm$ 0.5                                    |
| V8M/V8M <sup>C</sup>   | 1.3 $\pm$ 0.1                             | 4.1 [2.1,7.0]                                | 0.05 $\pm$ 0.01                                                                                       | 5.7 $\pm$ 0.3                                    |
| Y89D/Y89D <sup>C</sup> | 1.7 $\pm$ 0.1                             | 2.0 [1.2, 3.5]                               | 0.12 $\pm$ 0.01                                                                                       | 18.5 $\pm$ 1.2                                   |
| WT/V8M <sup>C</sup>    | 1.3 $\pm$ 0.1                             | 10.0 [5.5, 15.0]                             | ND                                                                                                    | ND                                               |
| WT/Y89D <sup>C</sup>   | 1.9 $\pm$ 0.1                             | 9.0 [4.9, 16.6]                              | ND                                                                                                    | ND                                               |
| WT/WT <sup>E</sup>     | 2.5 $\pm$ 0.2                             | 12.2 [6.7,18.4]                              | ND                                                                                                    | ND                                               |
| V8M/V8M <sup>E</sup>   | 1.3 $\pm$ 0.1                             | 7.3 [4.4,12.2]                               | ND                                                                                                    | ND                                               |
| Y89D/Y89D <sup>E</sup> | 1.7 $\pm$ 0.2                             | 6.3 [4.0, 7.0]                               | ND                                                                                                    | ND                                               |

281 \*Data reported as Mean  $\pm$  SEM. <sup>#</sup> Data reported as Median [quartiles]. ND, not determined.

282

283 ***Impact of V8M and Y89D mutations on unloaded motility properties of heterodimeric***  
 284 ***motors***

285 The V8M and Y89D mutations found in KAND patients are inherited in an autosomal  
 286 dominant manner, indicating that the disease allele can influence transport even in the presence  
 287 of a WT allele. We thus examined the effect of the KAND mutations in the heterodimeric state  
 288 where one motor domain is WT and the second motor domain harbors a KAND mutation. We  
 289 tested several strategies for generating heterodimeric motors but were unable to achieve  
 290 complete heterodimer formation (Fig S3). We thus co-transfected COS-7 cells with plasmids for  
 291 expression of WT motors tagged with mNeonGreen (mNG) and KAND mutant motors tagged with  
 292 HaloTag and FLAG tag (Fig 7A). We tested several imaging conditions to avoid artifacts related  
 293 to either of the tags (Fig S4) and carried out single-molecule motility assays using TIRF  
 294 microscopy. From the kymographs, motility events of heterodimeric motors were scored as co-  
 295 motility in both the mNG and Halo(JF552) fluorescence channels (Fig 7B,E&H, left panels). To  
 296 better visualize heterodimeric motor events, cartoon kymographs were generated to display  
 297 motile events (Fig 7B,E&H, middle panels) and diffusive events (Fig 7B, E&H, right panels).

298 The velocity (2.1  $\pm$  0.1  $\mu\text{m}/\text{s}$ ) and run length (19.8 [13.4, 27.0]  $\mu\text{m}$ ) of WT/WT<sup>C</sup> motors  
 299 tagged with both mNG and Halo(JF552) fluorophores (Fig 7B,C&D) are comparable to those of  
 300 KIF1A(393)-LZ-Halo-Flag motors (Fig 6; Table 3). The presence of the V8M motor domain  
 301 resulted in a significant reduction in velocity (1.3  $\pm$  0.1  $\mu\text{m}/\text{s}$  Fig 7E,F) such that the heterodimeric  
 302 WT/V8M<sup>C</sup> motor's velocity is comparable to that of homodimeric V8M/V8M<sup>C</sup> mutant motors (Table  
 303 3). In addition, the processivity of WT/V8M<sup>C</sup> motors (10.0 [5.5, 15.0]  $\mu\text{m}$ , Fig 7E,G) was  
 304 significantly reduced compared to WT/WT<sup>C</sup> motors but was not as severely hindered as in the  
 305 V8M/V8M<sup>C</sup> motors (Table 3).

306 The presence of the Y89D motor domain had minimal effects on velocity in the context of  
 307 the heterodimeric WT/Y89D<sup>C</sup> motor (1.9  $\pm$  0.1  $\mu\text{m}/\text{s}$ , Fig 7H,I) as compared to the WT/WT<sup>C</sup> motor  
 308 but resulted in a significant reduction in the processivity (9.0 [4.9, 16.6]  $\mu\text{m}$ , Fig 7H,J) although  
 309 these effects were not as severe as observed for the Y89D/Y89D homodimeric motors (Table 3).  
 310 In addition, the WT/Y89D<sup>C</sup> heterodimeric motors did not exhibit the diffusive behavior of the  
 311 Y89D/Y89D<sup>C</sup> homodimeric motors (Fig 7H). Collectively, these results suggest that when paired  
 312 with a WT motor domain in a heterodimeric motor, both the V8M and Y89D mutations cripple the  
 313 overall motility with greater effects on motor processivity than motor speed.



## 314 **Impact of V8M and Y89D mutations on transport of membrane-bound organelles in cells**

315 We next sought to test whether these mutations impacted the ability of motors to work as  
316 a team to drive cargo transport in cells. To do this, we used an inducible recruitment strategy (53,  
317 54) to link teams of motors to the surface of membrane-bound organelles and monitored their  
318 ability to drive organelle transport to the cell periphery (Fig 8A). To assess how teams of WT or  
319 KAND mutant KIF1A motors drive the transport of a low-load, membrane-bound organelle (36,  
320 54, 55), motors were recruited to the surface of peroxisomes, and transport of peroxisomes to the  
321 cell periphery was assessed after 5, 10, or 30 minutes. Cargo location before and after motor  
322 recruitment was qualitatively scored as clustered (black), partially dispersed (dark grey),  
323 diffusively dispersed (light grey), or peripherally dispersed (white; Fig 8C).

324 COS7 cells were co-transfected with a plasmid for the expression of WT or KAND mutant  
325 KIF1A(393)-LZ motors tagged with mNG and FRB domains and a plasmid for the expression of  
326 a peroxisome-targeted PEX-mRFP-FKBP fusion protein. In the absence of rapamycin, the PEX-  
327 RFP-FKBP peroxisomes were largely clustered in the center of the cell (93% of cells had clustered  
328 peroxisomes; Fig 8B,C) whereas KIF1A(393)-LZ-mNG-FRB motors accumulated at the periphery  
329 of the cell (Fig 8B). Addition of rapamycin resulted in recruitment of motors to the peroxisome  
330 surface via dimerization of the FRB and FKBP domains and motor activity drove dispersion of  
331 peroxisomes to the cell periphery. 5 minutes after recruitment of WT motors, 91% of cells (42/46)  
332 had peroxisomes dispersed to the periphery of the cell (Fig 8B,C). In contrast, 5 minutes after  
333 recruitment of teams of V8M or Y89D mutant motors, the peroxisomes failed to reach the  
334 periphery of the cell. Rather, 54% (29/53) of V8M-expressing and 35% (16/45) of Y89D-  
335 expressing cells displayed only partial peroxisome dispersion (Fig 8B,C).

336 We hypothesized that the impaired motility and force-generation properties of the V8M  
337 and Y89D motors could be overcome if the motors were given more time to complete the transport  
338 event. We thus repeated the peroxisome dispersion assay but waited 10 or 30 minutes after  
339 recruitment of teams of V8M or Y89D mutant motors to assess peroxisome localization. At 10 min  
340 after rapamycin-induced motor recruitment, 65% (31/48) of cells expressing the V8M mutant  
341 motor and 91% (39/43) of cells expressing the Y89D mutant motor displayed peripheral dispersion  
342 of the peroxisomes as compared to 96% (47/49) of cells expressing the WT motor (Fig 8C). After  
343 30 min of motor recruitment, the V8M and Y89D mutant motors were able to achieve peroxisome  
344 dispersion [91% (43/47) and 100% (49/49) of cells, respectively] to the same extent as the WT  
345 motor [92% (49/53) of cells, Fig 8C]. These results suggest that despite reduced force output,  
346 processivity, and velocity under single-molecule conditions, the V8M and Y89D mutant motors  
347 can drive cargo transport if the cargo imposes minimal load and the motors are given a longer  
348 time frame to complete the transport event.

349

350

## 351 **DISCUSSION**

352 Kinesin-3 motors drive a large number of intracellular trafficking events yet their ability to  
353 generate and sustain force has not been investigated. We find that, unlike conventional kinesin-  
354 1, mammalian KIF1A motors and *C. elegans* UNC-104 motors detach from the MT track under  
355 low forces. Furthermore, both motors rapidly reattach to the MT and continue forward motion, a  
356 property that may enable fast transport of presynaptic vesicles over long distances. While KIF1A  
357 motors do not stall under load, UNC-104 motors can stall before detaching. We find that the  
358 disease-associated V8M and Y89D mutations compromise the force output of single motors and  
359 result in decreased velocity, processivity, and landing rate via allosteric effects on regions of the  
360 core motor domain responsible for NL docking and the coordination and binding of nucleotide.

361 The mutant motors also show a delay in their ability to transport a low-load cargo in cells. These  
362 results highlight the benefits of combining single-molecule assays with structure-based  
363 simulations to investigate how subtle sequence changes can impact the mechanical output of a  
364 motor.

365

366 ***KIF1A readily detaches from microtubules under load but rapidly reattaches for persistent***  
367 ***motility***

368 Previous studies of kinesin-3 motors focused on their striking motility properties under no-  
369 load conditions. In these assays, truncated and thus constitutively-active versions of dimeric  
370 kinesin-3 motors were found to move with high speeds, to be superprocessive, and to readily  
371 engage with the MT (high landing rate) (16-18, 48, 56-58). Here we provide the first analysis of  
372 mammalian kinesin-3 motors under load and note several interesting aspects of KIF1A force  
373 generation that are likely to impact its cellular functions.

374 First, single KIF1A motors do not stall when subjected to resisting forces but rather, they  
375 rapidly detach from the MT track; this is in stark contrast to the ability of single kinesin-1 motors  
376 to resist detachment under load (19, 23, 24, 59). A high load-dependent detachment rate is  
377 consistent with previous work showing that kinesin-3 motors give up easily when forced to  
378 compete with kinesin-1 motors in driving cargo transport (39-41). Interestingly, kinesin-2  
379 (KIF3A/KIF3B) and kinesin-5 (Eg5) motors also have a tendency to detach at moderate forces in  
380 optical trap assays (60-66) and to give up easily when in competition with kinesin-1 (40).

381 Second, KIF1A motors can only sustain an average 2.7 pN of force before detachment  
382 from the MT track; this is in stark contrast to the ability of kinesin-1 motors to sustain 4-6 pN of  
383 force (19, 24, 27, 36). It seems unlikely that the detachment of KIF1A at low forces is due to the  
384 strength of the motor-MT interaction as KIF1A has a higher MT affinity than kinesin-1 both in the  
385 ADP-bound (weak MT affinity) and the ATP-bound (strong MT affinity and force-bearing) states  
386 (30, 48). It seems more likely that the detachment of KIF1A at low forces can be attributed to a  
387 mechanical/structural feature of this motor. An intriguing possibility is that the length of the N-  
388 terminal extension that precedes the CS impacts the strength of the CNB and thus the force output  
389 of the motor. Kinesin-3 motors lack an N-terminal extension (Fig S1) and recent structural studies  
390 and MD simulations of KIF13B showed that this kinesin-3 motor forms a short CNB with weaker  
391 CS-NL interactions than kinesin-1 (38, 67). At first glance, previous work on KIF1A's *C. elegans*  
392 homolog, UNC-104, would appear to contradict this model as UNC-104, which also lacks an N-  
393 terminal CS extension, frequently countered forces up to 6 pN (42). However, we have recently  
394 determined that the forces measured with this optical tweezers setup were likely affected by an  
395 unintended electronic low-pass filtering of the trapping data so that the reported maximal force of  
396 6 pN force is retrospectively estimated to be closer to 4 pN (24). Indeed, when we repeated the  
397 experiments with a modern optical tweezers setup, we found that UNC-104 stalls at 3 pN (Fig  
398 1C). Thus, like KIF1A, single UNC-104 motors sustain lower forces than kinesin-1 motors.

399 Third, after detachment, KIF1A motors rapidly reattach to the MT and again move forward  
400 against the trap. This behavior is consistent with the role of the kinesin-3-specific K-loop (loop 12)  
401 whose positively-charged residues are responsible for the high landing rate of KIF1A motors (48,  
402 56). We note that the rapid detachment and reattachment of single KIF1A motors results in a  
403 characteristic sawtooth pattern for the force vs. time plot that has not been observed for other  
404 motors to date.

405

406

## 407 ***KAND Mutations Provide Insight into a Conserved Mechanism of Kinesin Force Generation***

408 Recent structural and biochemical assays with dimeric kinesin-1 motors have provided  
409 strong support for the model that nucleotide-dependent conformational changes in the NL  
410 facilitate force generation. NL docking is initiated by an ATP-dependent conformational change in  
411  $\alpha 6$  that drives a two-step NL docking: zipping together of the NL's  $\beta 9$  with the CS ( $\beta 0$ ) to form the  
412 CNB and then latching of the NL's  $\beta 10$  along the surface of the core motor domain (27, 29, 36).  
413 Structural studies have shown that similar ATP-induced changes occur to  $\alpha 6$  and the NL in  
414 members of the kinesin-3 and kinesin-5 families (30-35, 37), supporting the hypothesis that NL  
415 docking is a force-generating mechanism utilized by all superfamily members. Our work provides  
416 the first test of this model for a member of the kinesin-3 family.

417 We focused on two *de novo* KIF1A disease variants, V8M and Y89D, as these residues  
418 are predicted to have roles in CNB formation and NL docking based on their a) location in  
419 structural elements of the motor domain associated with force generation in kinesin-1 motors, and  
420 b) occurrence in residues that are highly conserved across the kinesin superfamily (Figs 2C and  
421 S1). Our MD simulations found that the V8M and Y89D mutations impair docking of the N-terminal  
422 ( $\beta 9$ ) or C-terminal ( $\beta 10$ ) portions of the NL to the KIF1A motor domain, respectively (Figs 2 and  
423 3). Indeed, using an optical tweezers assay, we found that the V8M and Y89D mutations resulted  
424 in a significantly reduced force generation (Fig 5). Thus, our results extend the model that  
425 nucleotide-dependent conformational changes in the NL are an important mechanical element for  
426 force generation by kinesin motors.

427 Previous work on KIF1A by Nitta et al. (37) examined the effects of mutations in  $\beta 0$ ,  $\beta 9$   
428 and  $\beta 10$  on KIF1A motor activity and found that while mutations in these three structural elements  
429 resulted in relatively normal ATPase activities, mutation of  $\beta 9$  resulted in a decreased velocity in  
430 MT-gliding assays. These results support the idea that NL docking, particularly CNB formation, is  
431 critical for KIF1A motility, however, these mutations were examined in the context of monomeric  
432 motors that contained the catalytic core of KIF1A fused to the NL of the kinesin-1 motor KIF5C.  
433 Thus, our work provides the first evidence that NL docking is critical for force generation by KIF1A  
434 motors.

435

## 436 ***Allostery between force generation and motility properties***

437 KIF1A motors containing V8M or Y89D mutations also exhibited changes in their unloaded  
438 motility properties. The speed of both mutant motors was reduced, likely due to allosteric effects  
439 of impaired NL docking on motor regions that coordinate and bind nucleotide (S1-PL and S1-S2,  
440 Figs 2 and 3). These findings are consistent with previous structural and enzymatic studies  
441 suggesting that docking of the NL gates ATPase activity in both kinesin-1 and kinesin-3 motors  
442 (30, 37, 49, 50, 68, 69).

443 The V8M and Y89D mutant motors also exhibited defects in motor-MT interactions as they  
444 were less able to engage productively with MTs (lower on-rate) and moved with reduced  
445 processivity. These observations appear to conflict with a recent single-molecule characterization  
446 of full-length KIF1A (70), which showed that homodimeric human KIF1A motors containing the  
447 V8M mutation have an increased landing rate and velocity as compared to the WT motor.  
448 However, these apparent discrepancies can be explained by the fact that the V8M mutation  
449 relieves auto-inhibition of the full-length motor. That is, the V8M mutation activates the full-length  
450 motor in the study of Chiba *et al.* (70) but reduces the MT engagement of our constitutively-active,  
451 minimal dimeric motors. Similarly, the V8M mutation increases the velocity of the auto-inhibited  
452 full-length motor (70) whereas it reduces the velocity of our minimal dimeric motors (Table 3).  
453 Taken together, the data suggest that while the V8M mutation results in a (toxic) gain-of-function

454 in the animal caused by the relief of auto-inhibition (70), the mutant motors are hampered by a  
455 reduced MT on-rate, velocity and processivity. Similar effects have been described for other  
456 kinesin motors where mutations that relieve autoinhibition can have varying effects on single-  
457 molecule properties *in vitro* and result in gain-of-function phenotypes in cells or animals (70-76).

458 Finally, for the Y89D mutation, we found that a significant fraction of the mutant motors  
459 engaged in non-motile, diffusive MT-binding events and those motors that did undergo processive  
460 motility appeared to “wobble” as they walked (Fig 6). These results indicate that the Y89D motor  
461 is trapped in an ADP-bound and weakly MT-bound state (16). While the MD simulations predicted  
462 that the Y89D mutation would impair ATP hydrolysis but not nucleotide binding (Fig 4C-E), the  
463 simulations were carried out on motors strongly bound to MTs in the ATP state. Our results  
464 therefore suggest that the Y89D mutation has an additional impact on motility in a stage of the  
465 mechanochemical cycle prior to the ATP state, namely, in the motor’s ability to release ADP in  
466 response to MT binding.

467

### 468 ***Effects on cargo transport and implications for disease***

469 The mechanical and motility properties of KIF1A are likely matched to the cellular functions  
470 of this motor and are optimized for transport under physiological conditions. KIF1A motors drive  
471 long-range transport of SVPs and DCVs in neurons (4-9) under conditions where teams of 2-4  
472 motors engage with the MT (77, 78). The fast and superprocessive motility of KIF1A motors would  
473 be advantageous for long-distance transport and a high-force output may not be required for  
474 teams of motors to transport small membrane-bound organelles. The rapid detachment and  
475 reattachment of individual motors in response to a hindering load would prevent motors from  
476 slowing or stalling and thereby help teams of motors navigate obstacles and ensure fast,  
477 continuous transport.

478 How mutations in KIF1A protein cause disease is still unclear and both loss-of-function  
479 and gain-of-function mutations have been linked to human neurodevelopmental and  
480 neurodegenerative diseases. V8M and Y89D are *de novo* mutations that manifest in an autosomal  
481 dominant manner to cause pure hereditary spastic paraplegia with childhood onset [OMIM  
482 #610357, (43)] and Mental retardation, autosomal dominant 9 [OMIM #614255, (44)],  
483 respectively. Our results indicate that these mutations result in reduced speed, processivity,  
484 landing-rate, and force output of single KIF1A motors and delayed transport driven by teams of  
485 mutant motors in an unpolarized cell (Fig 8). Furthermore, our single-molecule motility results  
486 suggest that the presence of a mutant motor domain is sufficient to impair the motility properties  
487 of heterodimeric WT/mutant motors (Fig 7). It seems likely that in patients, transport driven by  
488 these mutant motors is compromised given the long-distances and spatial constraints that  
489 characterize transport in neuronal cells.

## 490 MATERIALS AND METHODS

### 491 Structural model and MD simulations of KIF1A-motor complex

492 Initial coordinates of KIF1A kinesin motor domain in the ATP-bound state (ATP analogue,  
493 ANP) and in complex with the tubulin heterodimer were taken from PDB 4UXP (30). The kinesin  
494 motor domain sequence was that of *HsKIF1A* (Uniprot ID Q12756). Missing coordinates, where  
495 applicable, were modeled using MODELLER v9.18 (79). A total of 100 models were generated  
496 with the following options in MODELLER: variable target function method (VTM) was set to slow  
497 with associated conjugate gradient set to 150 iterations, MD with simulated annealing option was  
498 set to slow, and the entire optimization process was repeated twice. The top-scoring model was  
499 selected for MD simulations with discrete optimized protein energy (DOPE) score (80) for loop  
500 refinement.

501 Energy minimization and MD simulations were performed with AMBER 18 (University of  
502 California San Francisco) and the ff99SB AMBER force field (81). Nucleotide parameters were  
503 obtained from (82). Histidine protonation states were assigned based on their pKa values  
504 calculated by PROPKA (83). MD simulations were started from equilibrated structures with at  
505 least four independent runs of at least 200 ns each. All simulations were performed in-house on  
506 NVIDIA GPU cards with the GPU version of PMEMD (pmemd.cuda). We thank NVIDIA for their  
507 gift of GPU card through their Academic GPU seed grant. Trajectory analyses were carried out in  
508 R using the Bio3D v2.3-3 package (84).

509 Residue-residue distance differences between wildtype (WT) and mutant ATP-bound  
510 kinesin motor domain in complex with tubulin heterodimer were identified with ensemble  
511 difference distance matrix (eDDM) analysis routine (36, 85). For this analysis, a total of 400  
512 conformations were obtained for each state under comparison by extracting 100 equally time-  
513 spaced conformations from the last 20 ns of each simulation replicate. Briefly, the eDDM routine  
514 reduces the difference between long distances while differences between short distances are kept  
515 intact. The significance of residue distance variation between apo and ATP-bound states, and  
516 between ATP-bound and mutant states, were evaluated with the Wilcoxon test. Residue pairs  
517 showing a p-value  $<10^{-5}$  and an average masked distance difference  $>1$  Å were considered  
518 statistically significant residue-residue distance differences for further analysis.

### 519 Plasmids

521 A truncated, constitutively active kinesin-3 [rat KIF1A(1-393)] followed by a leucine zipper  
522 was used (16). Point mutations were generated using QuickChange site-directed mutagenesis  
523 and all plasmids were verified by DNA sequencing. Motors were tagged with an Avitag for  
524 biotinylation and attachment to beads in optical tweezers assays, three tandem monomeric Citrine  
525 fluorescent proteins (3xmCit), a monomeric NeonGreen or Halo-FLAGtag for single-molecule  
526 imaging assays, or monomeric NeonGreen (mNG)-FRB for inducible cargo dispersion assays in  
527 cells (54, 86). The peroxisome-targeting PEX3-mRFP-FKBP construct was a gift from Casper  
528 Hoogenraad (Utrecht University (53)). Constructs coding for FRB (DmrA) and FKBP (DmrC)  
529 sequences were obtained from ARIAD Pharmaceuticals and are now available from Takara Bio  
530 Inc. Plasmids encoding monomeric NeonGreen were obtained from Allele Biotechnology.

531 A plasmid for *E. coli*-purified KIF1A(393)-LZ was a gift from Dr. Cassandra M. Ori-  
532 McKenney (UC Davis (87)). The plasmid was sequenced to ensure that no mutations were  
533 present. The construct was amplified by PCR and inserted into pSNAP-tag®(T7)-2 vector (New  
534 England Biolabs Inc. #N9181S) with a SNAPf-EGFP-6His cassette. Single point mutations in  
535 KIF1A were generated by the NEB Q5® site-directed mutagenesis kit (New England Biolabs Inc.  
536 #E0554S) and confirmed by sequencing.

537

## 538 **Cell culture, transfection, and lysate preparation**

539 COS-7 (African green monkey kidney fibroblasts, American Type Culture Collection,  
540 RRID:CVCL\_0224) were grown at 37°C with 5% (vol/vol) CO<sub>2</sub> in Dulbecco's Modified Eagle  
541 Medium (Gibco) supplemented with 10% (vol/vol) Fetal Clone III (HyClone) and 2 mM GlutaMAX  
542 (L-alanyl-L-glutamine dipeptide in 0.85% NaCl, Gibco). Cells are checked annually for  
543 mycoplasma contamination and were authenticated through mass spectrometry (the protein  
544 sequences exactly match those in the African green monkey genome). 24 hours after seeding,  
545 cells were transfected using TransIT-LT1 transfection reagent (Mirus) and the JF552 HaloTag  
546 ligand (Tocris Bioscience) was added to cell culture media to a final concentration of 50 nM. Cells  
547 were trypsinized and harvested 24 hours after transfection by low-speed centrifugation at 3000 x  
548 g at 4°C for 3 minutes. The pellet was resuspended in cold 1X PBS, centrifuged at 3000 x g at  
549 4°C for 3 minutes, and the pellet was resuspended in 50 µL of cold lysis buffer [25 mM  
550 HEPES/KOH, 115 mM potassium acetate, 5 mM sodium acetate, 5 mM MgCl<sub>2</sub>, 0.5 mM EGTA,  
551 and 1% (vol/vol) Triton X-100, pH 7.4] with 1 mM ATP, 1 mM phenylmethylsulfonyl fluoride, and  
552 1% (vol/vol) protease inhibitor cocktail (P8340, Sigma-Aldrich). Lysates were clarified by  
553 centrifugation at 20,000 x g at 4°C for 10 minutes and lysates were snap frozen in 5 µL aliquots  
554 in liquid nitrogen and stored at -80°C.  
555

## 556 **Protein Expression and Purification from *E. coli***

557 Plasmids were transformed into BL21-CodonPlus(DE3)-RIPL competent cells (Agilent  
558 Technologies #230280). A single colony was inoculated in 1 mL of terrific broth (TB) with 50 µg/mL  
559 carbenicillin and 50 µg/mL chloramphenicol. The 1-mL culture was shaken at 37°C overnight, and  
560 then inoculated into 400 mL of TB with 2 µg/mL carbenicillin and 2 µg/mL chloramphenicol. The  
561 400-mL culture was shaken at 37°C for 4-5 hours, and then cooled on ice for 1 hour. IPTG was  
562 then added to the culture to final 0.1 mM concentration to induce expression. Afterwards the  
563 culture was shaken at 18°C overnight. The cells were harvested by centrifugation at 3000 rcf for  
564 10 minutes at 4°C. The supernatant was discarded, and 5 mL of B-PER™ complete bacterial  
565 protein extraction reagent (Thermo Scientific #89821) with 2 mM MgCl<sub>2</sub>, 1 mM EGTA, 1 mM DTT,  
566 0.1 mM ATP, 2 mM PMSF, and 10% glycerol was added to the cell pellet to fully resuspend the  
567 cells. The resuspended cells were flash frozen and store at -80°C.

568 To purify protein, the frozen cells were thawed at 37°C. The solution was nutated at room  
569 temperature for 20 minutes and then dounced for 10 strokes on ice to lyse the cells. The cell  
570 lysate was cleared by centrifugation at 80,000 rpm for 10 minutes at 4°C using Beckman tabletop  
571 centrifuge unit. The lysate was nutated with 200 µL of Ni-NTA resin (Roche cOMplete™ His-Tag  
572 purification resin, Millipore Sigma #5893682001) at 4°C for 1 hour. The resin was washed with  
573 wash buffer (50 mM HEPES, 300 mM KCl, 2 mM MgCl<sub>2</sub>, 1 mM EGTA, 1 mM DTT, 1 mM PMSF,  
574 0.1 mM ATP, 0.1% Triton X-100, 10% glycerol, pH 7.2), and labeled with 10 µM SNAP-Cell®  
575 TMR-Star (New England Biolabs Inc. #S9105S) at room temperature for 10 minutes. The resin  
576 was further washed, and the protein was eluted with elution buffer (wash buffer with 250 mM  
577 imidazole). The elute was flash frozen and store -80°C.

578 To remove inactive motors, an MT-binding and -release (MTBR) assay was performed  
579 (46). 50 µL of eluted protein was buffer exchanged into low salt buffer (30 mM HEPES, 50 mM  
580 KCl, 2 mM MgCl<sub>2</sub>, 1 mM EGTA, 1 mM DTT, and 0.1 mM AMP-PNP) using 0.5-mL Zeba™ spin  
581 desalting column (7-kDa MWCO) (Thermo Scientific #89882). AMP-PNP and taxol were added  
582 to the flow-through to a final concentration of 1 mM and 10 µM, respectively. After 5 µL of 5 mg/mL  
583 taxol-stabilized MTs was added to the mixture, the solution was incubated at room temperature  
584 for 5 minutes to allow motors to bind to the MTs. The mixture was then spun through a 100 µL  
585 glycerol cushion (PIPES 80 mM, 2 mM MgCl<sub>2</sub>, 1 mM EGTA, 1 mM DTT, 10 µM taxol, and 60%  
586 glycerol) by centrifugation at 40000 rpm for 10 minutes at room temperature. Next, the

587 supernatant was removed and the pellet was resuspended in 50  $\mu$ L high salt buffer (30 mM  
588 HEPES, 300 mM KCl, 2 mM  $MgCl_2$ , 1 mM EGTA, 1 mM DTT, 10  $\mu$ M taxol, 3 mM ATP, and 10%  
589 glycerol). The MTs were then removed by centrifugation at 40,000 rpm for 5 minutes at room  
590 temperature. Finally, the supernatant was aliquoted and flash frozen in liquid nitrogen and stored  
591 at  $-80^\circ C$  (MTBR fraction).  
592

### 593 **TIRF single-molecule motility assays**

594 MTs were polymerized (tubulin, Cytoskeleton Inc) in BRB80 buffer (80 mM Pipes/KOH pH  
595 6.8, 1 mM  $MgCl_2$ , 1 mM EGTA) supplemented with GTP and  $MgCl_2$  and incubated for 60 minutes  
596 at  $37^\circ C$ . 2  $\mu$ M taxol in prewarmed BRB80 was added and incubated for 60 minutes to stabilize  
597 MTs. MTs were stored in the dark at room temperature for up to 2 weeks. Flow cells were prepared  
598 by attaching a #1.5 mm coverslip (Thermo Fisher Scientific) to a glass slide (Thermo Fisher  
599 Scientific) using double-sided tape. MTs were diluted in fresh BRB80 buffer supplemented with  
600 10  $\mu$ M taxol, infused into flow cells, and incubated for four minutes to allow for nonspecific  
601 absorption to the glass. Flow cells were then incubated with blocking buffer [0.5 mg/mL casein in  
602 imaging buffer supplemented with 10  $\mu$ M taxol] for four minutes. Flow cells were then infused with  
603 motility mixture (0.5–1.0  $\mu$ L of COS7 cell lysate, 25  $\mu$ L imaging buffer, 15  $\mu$ L blocking buffer, 1  
604 mM ATP, 0.5  $\mu$ L 100 mM DTT, 0.5  $\mu$ L 20 mg/mL glucose oxidase, 0.5  $\mu$ L 8 mg/mL catalase, and  
605 0.5  $\mu$ L 1 M glucose), sealed with molten paraffin wax, and imaged on an inverted Nikon Ti-E/B  
606 TIRF microscope with a perfect focus system, a 100x 1.49 NA oil immersion TIRF objective, three  
607 20 mW diode lasers (488 nm, 561 nm, and 640 nm) and an EMCCD camera (iXon+ DU879;  
608 Andor). Image acquisition was controlled using Nikon software and all assays were performed at  
609 room temperature. To optimize the single-molecule imaging conditions for KIF1A motors in COS-  
610 7 cell lysates, the following imaging buffers were utilized: P12 (12 mM Pipes/KOH pH 6.8, 1 mM  
611  $MgCl_2$ , 1 mM EGTA), BRB40 (40 mM Pipes/KOH pH 6.8, 1 mM  $MgCl_2$ , 1 mM EGTA), BRB80 (80  
612 mM Pipes/KOH pH 6.8, 1 mM  $MgCl_2$ , 1 mM EGTA), or PERM (25mM HEPES/KOH, 115mM  
613 potassium acetate, 5mM sodium acetate, 5mM  $MgCl_2$ , and 0.5mM EGTA, pH 7.4). Motility assays  
614 were carried out in BRB40 buffer with MTs 35–75  $\mu$ m in length.

615 Motility data were analyzed by first generating maximum intensity projections to identify  
616 MT tracks (width = 3 pixels) and then generating kymographs in ImageJ (National Institutes of  
617 Health). All motility events that lasted for at least three frames were analyzed. As many of these  
618 events end when the motor reaches the end of a MT, the reported run lengths are an  
619 underestimation of the motor's processivity. The reported run lengths are also limited by the length  
620 of the MTs in the imaging chamber. For each motor construct, the velocities and run lengths were  
621 binned and a histogram was generated by plotting the number of motility events for each bin. At  
622 least 150 motility events were quantified for each motor across three independent trials and  
623 summarized as a histogram or dot plot. A corresponding Gaussian or exponential distribution was  
624 overlaid on each histogram plot using rate and shape parameters derived from fitting the  
625 cumulative distributions. Motor velocities were fit to a Gaussian cumulative distribution as  
626 previously described (41) and a one-way analysis of variance test was used to assess whether  
627 velocity distributions were significantly different between motors. Motor run lengths were fit to an  
628 exponential decay cumulative distribution where appropriate as previously described (41) and a  
629 Kruskal-Wallis one-way analysis of variance was used to assess whether run length distributions  
630 were significantly different between motors. For run lengths histograms that did not follow an  
631 exponential distribution, median values with percentiles (25%, 75%) were calculated.

632 Single-molecule TIRF motility studies of *E. coli* expressed and purified KIF1A motors was  
633 performed as described (46). Motility assays were carried out in BRB40 buffer with MTs 10–35  
634  $\mu$ m in length. For each movie, a total of 600 frames was acquired with an acquisition time of 200  
635 ms per frame.  
636

### 637 **Optical tweezers assay**

638 The polystyrene trapping beads, MTs and slides were prepared as described previously  
639 (46). Briefly, polystyrene beads with an average diameter of 500 nm (Bangs Laboratories Inc.  
640 #PC02002) were coated with streptavidin and  $\alpha$ -casein, or with an anti-GFP antibody and  $\alpha$ -  
641 casein. Coverslips (Zeiss #474030-9000-000) were cleaned with 25% HNO<sub>3</sub> and 2 M NaOH,  
642 washed with ddH<sub>2</sub>O, air dried, and stored at 4°C. The flow chamber was assembled with a glass  
643 slide, parafilm stripes, and a cleaned coverslip as described (46). MTs with incorporated  
644 biotinylated tubulin were attached to the cover glass surface via  $\alpha$ -casein-biotin and streptavidin.  
645 Control cell lysate without KIF1A expression was tested to ensure there were no non-specific  
646 interactions between other endogenous motors in the lysate and the beads. 100 beads were  
647 tested and no force generation was observed under the same experimental conditions used for  
648 cell lysates containing tagged KIF1A constructs. Cell lysate with KIF1A was pre-diluted 50-200x,  
649 while the MTBR fraction of *E. coli*-expressed KIF1A was pre-diluted 200-5000x. 1  $\mu$ L of the  
650 predilution was incubated with 0.4  $\mu$ L beads on ice for 15 minutes. For experiments with the cell  
651 lysate, the lysate was pre-diluted so that less than 10% of the beads showed force generation;  
652 for experiments with the *E. coli*-expressed KIF1A, the solution was diluted so that less than 30%  
653 of the beads tested showed force generation events. Finally, the protein-bead mixture was diluted  
654 in 40  $\mu$ L assay buffer (60 mM HEPES, 50 mM KoAc, 2 mM MgCl<sub>2</sub>, 1 mM EGTA, 1 mM DTT, 10  
655  $\mu$ M taxol, 2 mM ATP, 50 mM glucose, glyoxy, 1.25 mg/ml  $\alpha$ -casein, 10% glycerol) and flowed into  
656 the slide chamber. All optical trapping experiments were performed with a LUMICKS C-Trap<sup>®</sup>,  
657 which combines optical tweezers with 3-color TIRF microscopy and interference reflection  
658 microscopy (IRM) to visualize unlabeled MTs (88).

659

### 660 **Inducible peroxisome dispersion assay**

661 Plasmids for expression of WT or mutant rat KIF1A(339)-LZ motors tagged with  
662 monomeric NeonGreen and an FRB domain were cotransfected into COS-7 cells with a plasmid  
663 for expression of PEX3-mRFP-FKBP at a ratio of 6:1 with TransITLT1 transfection reagent  
664 (Mirus). Eight hours after transfection, rapamycin (Calbiochem, Millipore Sigma) was added to  
665 final concentration of 44 nM to promote FRB and FKBP heterodimerization and recruitment of  
666 motors to peroxisomes. 0, 5, 10, or 30 minutes after addition of rapamycin and recruitment of  
667 motors to the surface of peroxisomes, cells were fixed with 3.7% formaldehyde (Thermo Fisher  
668 Scientific) in 1X PBS for 10 minutes, quenched in 50 mM ammonium chloride in PBS for 5  
669 minutes, and permeabilized in 0.2% Triton X-100 in PBS for 5 minutes. Coverslips were mounted  
670 in ProlongGold (Invitrogen) and imaged using an inverted epifluorescence microscope (Nikon  
671 TE2000E) with a 40x/0.75 NA objective and a CoolSnapHQ camera (Photometrics). Only cells  
672 expressing low levels of motor-mNG-FRB were imaged and included in quantification. The  
673 phenotype of cargo dispersion was scored as clustered, partial dispersion, diffuse dispersion, or  
674 peripheral dispersion based on the signal localization in the PEX3 (peroxisome) channel. The  
675 data for each construct across three independent trials is summarized as a stacked bar plot.



676 **ACKNOWLEDGEMENTS**

677 BGB was supported by the NIH Cellular and Molecular Biology Training Grant T32-GM007315, a  
678 Graduate Student Research Fellowship from NSF DGE 1256260, and a Rackham Predoctoral  
679 Fellowship from the University of Michigan. SJ was supported by the Qatar Research Leadership  
680 Program. Work in the laboratory of KJV is supported by NIH grants R01GM070862 and  
681 R35GM131744. DS is supported by NIH grant R01GM136822. LR and AG are supported by the  
682 NIH grants R01GM098469 and R01NS114636.

683

684

685

686 **AUTHOR CONTRIBUTIONS**

687 BGB, SJ, LR, DS, KJV, and AG designed the research; BGB, SJ and LR performed the research;  
688 BGB produced WT and mutant KIF1A motors expressed in COS-7 cells and LR produced and  
689 purified *E. coli*-expressed proteins. BGB and LR analyzed experimental data and SJ and DS  
690 performed MD simulations. BGB, SJ, LR, DS, KJV, and AG wrote the manuscript.

691

692

693

694 **COMPETING INTEREST**

695 All authors declare that they have no competing interests.

696 **FIGURE LEGENDS**

697 **Fig 1. KIF1A and UNC-104 detach under low force and rapidly reattach to the MT.** (A,B,E,F)  
698 Representative force vs. time records of bead movement driven by single molecules of (A)  
699 kinesin-1 KIF5C(1-560) in COS-7 cell lysates (KIF5C<sup>C</sup>), (B) kinesin-3 UNC-104(1-389) purified  
700 from *E. coli* bacteria (UNC-104<sup>E</sup>), (E) kinesin-3 KIF1A(1-393)-LZ in COS-7 cell lysates (KIF1A<sup>C</sup>),  
701 and (F) kinesin-3 KIF1A(1-393)-LZ purified from *E. coli* bacteria (KIF1A<sup>E</sup>). (C) Stall force  
702 histograms of KIF5C<sup>C</sup> ( $4.64 \pm 0.01$  pN, mean  $\pm$  SEM from Gaussian fit; stall plateaus  $\geq 200$  ms;  $N$   
703 = 197) and UNC-104<sup>E</sup> ( $2.94 \pm 0.03$  pN, stall plateaus  $\geq 10$  ms;  $N$  = 126) compiling forces at  $k$  =  
704 0.05 – 0.06 pN/nm. (D) Detachment forces. Green bars indicate the median values with quartiles.  
705 KIF5C<sup>C</sup>: 4.43 [3.79, 4.86] pN,  $N$  = 557; UNC-104<sup>E</sup>: 2.59 [2.23, 2.94] pN,  $N$  = 561; KIF1A<sup>E</sup>: 2.65  
706 [2.25, 3.05] pN,  $N$  = 1044; KIF1A<sup>C</sup>: 2.66 [2.25, 3.01] pN,  $N$  = 1912. (G) Number of motor  
707 engagement events per MT encounter. KIF5C<sup>C</sup>:  $1.2 \pm 0.1$  (mean  $\pm$  SEM),  $N$  = 50; UNC-104<sup>E</sup>:  $5.0$   
708  $\pm 0.6$ ,  $N$  = 50; KIF1A<sup>E</sup>:  $24 \pm 3$ ,  $N$  = 50; KIF1A<sup>C</sup>:  $25 \pm 4$ ,  $N$  = 50.

709  
710 **Fig 2. KIF1A disease variants cluster within regions of the motor domain critical for MT**  
711 **binding, nucleotide binding/hydrolysis, and stepping/force generation.** (A,B) KIF1A disease  
712 variants (red) mapped onto the KIF1A motor domain (A) protein sequence and (B) ribbon  
713 representation of the ADP-bound, tubulin-bound state (PDB 4UYO). Functional elements are  
714 indicated as dark blue: MT binding (Loop8,  $\alpha 4$ , Loop12,  $\alpha 5$ ); medium blue: stepping/force  
715 generation (CS,  $\alpha 1$ - $\beta 3$ ,  $\beta 8$ , Loop 13, NL); and cyan: nucleotide binding/hydrolysis (Loop 9, Loop  
716 11, P Loop,  $\alpha 0$ ). (C) Alignment of sequences implicated in force generation for the human kinesin  
717 motor domain from the kinesin-1 and kinesin-3 families.

718  
719 **Fig 3. MD simulations predict that the V8M mutation alters NL docking and catalytic site**  
720 **closure.** (A-D) Ribbon representation of the KIF1A motor domain in the ATP-bound, tubulin-  
721 bound state (PDB 4UXP). The V8M mutation ( $\beta 1$ ) is denoted as a red circle. Red lines depict  
722 residue-residue distances that are shorter in the V8M mutant whereas blue lines depict residue-  
723 residue distances that are shorter in the WT motor. The magnitude of the distance change is  
724 indicated by color intensity. (A,B) View of the NL docking pocket. In this post-power stroke state,  
725 the NL (green) is docked along the core motor domain. Secondary structures are indicated as  
726 purple: CS; dark green:  $\alpha 1$ - $\beta 3$ ; yellow:  $\beta 7$ ; teal:  $\beta 8$ ; and orange: Loop 13 (L13). (C,D). View of the  
727 nucleotide-binding pocket. Secondary structures are indicated as purple: Loop 9/Switch1 (L9/S1);  
728 green: Loop 11/Switch2 (L11/S2); yellow: P Loop (PL); and orange:  $\alpha 0$ . (E) Differences in residue-  
729 residue distances between WT KIF1A and V8M mutant motor in the ATP-bound, tubulin-bound  
730 state determined in MD simulations. The secondary structure elements are laid out along the x-  
731 and y-axes with  $\alpha$ -helices in black and  $\beta$ -strands in grey or colored according to (A). Residue-  
732 residue interactions that are significantly ( $p < 10^{-5}$ ) shorter in V8M mutant (red) or the WT motor  
733 (blue) are displayed on the grid. The magnitude of the distance change is indicated by color  
734 intensity.

735  
736 **Fig 4. MD simulations predict that the Y89D mutation alters NL docking and catalytic site**  
737 **closure.** (A-D) Ribbon representation of the KIF1A motor domain in the ATP-bound, tubulin-  
738 bound state (PDB 4UXP). The Y89D mutation ( $\alpha 1$ - $\beta 3$ ) is denoted as a red circle. Red lines depict  
739 residue-residue distances that are shorter in the Y89D mutant whereas blue lines depict residue-  
740 residue distances that are shorter in the WT motor. The magnitude of the distance change is  
741 indicated by color intensity. (A,B) View of the NL docking pocket. In this post-power stroke state,  
742 the NL (green) is docked along the core motor domain. Secondary structures are indicated as  
743 purple: CS; dark green:  $\alpha 1$ - $\beta 3$ ; yellow:  $\beta 7$ ; teal:  $\beta 8$ ; and orange: Loop 13 (L13). (C,D) View of the  
744 nucleotide-binding pocket. Secondary structures are indicated as purple: Loop 9/Switch1 (L9/S1);  
745 green: Loop 11/Switch2 (L11/S2); yellow: P Loop (PL); and orange:  $\alpha 0$ . (E) Differences in residue-

746 residue distances between WT KIF1A and the Y89D mutant motor in the ATP-bound, tubulin-  
747 bound state determined in MD simulations. The secondary structure elements are laid out along  
748 the x-and y-axes with  $\alpha$ -helices in black and  $\beta$ -strands in grey or colored according to (A).  
749 Residue-residue interactions that are significantly ( $p < 10^{-5}$ ) shorter in Y89D mutant (red) or the WT  
750 motor (blue) are displayed on the grid. The magnitude of the distance change is indicated by color  
751 intensity.

752  
753 **Fig 5. V8M and Y89D mutations result in decreased force output for KIF1A motors.** (A-D)  
754 Representative force vs. time records of bead movement driven by single molecules of KIF1A-  
755 V8M mutant motors in (A) COS-7 cell lysates (KIF1A<sup>C</sup>-V8M) or (B) purified from *E. coli* (KIF1A<sup>E</sup>-  
756 V8M) or KIF1A-Y89D mutant motors in (C) COS-7 cell lysates or (D) purified from *E. coli*. (E,F)  
757 Detachment forces of (E) V8M and (F) Y89D mutant motors. Green bars indicate the median  
758 values with quartiles. V8M: 1.94 [1.65, 2.22] pN,  $N = 1343$ ; Y89D: 1.02 [0.87, 1.19] pN,  $N = 1468$ .  
759

760 **Fig 6. Homodimeric V8M and Y89D mutant motors display decreased speed, processivity,**  
761 **and landing rates.** WT or mutant motors fused to a HaloTag<sup>®</sup> and a FLAG-tag, and fluorescently  
762 labeled with the JF552-HaloTag ligand, were analyzed in standard single-molecule motility assays  
763 using TIRF microscopy. (A) Representative kymographs with time displayed on the y-axis (bar, 4  
764 s) and distance displayed on the x-axis (bar, 4  $\mu$ m). White arrowheads indicate motility events  
765 scored as diffusive events. (B) Magnified view of the kymographs in (A) with x-axis bar, 1  $\mu$ m and  
766 y-axis bar, 1 s. Dotted white lines indicate linear motility; white asterisks indicate “wobbly” events  
767 that deviate from linear motility. (C-E) Quantification of motility properties. From the kymographs,  
768 single-motor (C) velocities (mean  $\pm$  SEM), (D) run lengths (median [quartiles]), and (E) landing  
769 rates were determined. For (E), each dot indicates the motor landing rate along a single MT with  
770 the population mean indicated by a horizontal black line across three independent experiments  
771 for each construct; \*\*\*,  $p < 0.001$  as compared to the WT motor. (F,G) Quantification of diffusive  
772 motility events. From the kymographs, the (F) percentage of diffusive events (dwell time longer  
773 than 400 ms, net displacement less than 200  $\mu$ m) and (G) dwell time of the diffusive events were  
774 determined. Each spot indicates the behavior of a single motor. Black horizontal lines indicate the  
775 population mean; \*\*\*,  $p < 0.001$  as compared to WT motor.  
776

777 **Fig 7. Heterodimeric WT/V8M and WT/Y89D mutant motors display decreased processivity.**  
778 (A) Schematic of strategy for generating heterodimeric WT/mutant KIF1A motors. WT KIF1A(1-  
779 393)-LZ was tagged with monomeric NeonGreen (mNG) whereas V8M and Y89D motors were  
780 tagged with Halo-FLAG and labelled with JF552. When co-expressed in cells, three populations  
781 of motors are expected in TIRF single-molecule assays: homodimeric WT motors tagged with  
782 mNG, homodimeric mutant motors tagged with Halo/JF552, and heterodimeric WT/mutant motors  
783 tagged with mNG and Halo/JF552. (B-J) Single-molecule motility analyses based on TIRF  
784 microscopy data. (B,E,H) Representative kymographs (left) with time displayed on the y-axis (bar,  
785 4 s) and distance displayed on the x-axis (bar, 4  $\mu$ m). Cartoon kymographs were generated from  
786 merged kymograph to more clearly illustrate motile (middle) and diffusive events (right). From the  
787 kymographs, single-motor (C,F,I) velocities and (D,G,J) run lengths were determined and the  
788 data for each population were plotted as a histogram. The mean values  $\pm$  SEM (for velocities)  
789 and median with quartiles (for run lengths) are indicated on each graph; \*\*\*,  $p < 0.001$  as compared  
790 to the WT motor.  
791

792 **Fig 8. V8M and Y89D mutant motors show delayed transport of membrane-bound cargo in**  
793 **cells.** (A) Schematic of the inducible motor recruitment assay. A kinesin motor fused to mNG and  
794 an FRB domain (KIF1A-mNG-FRB) is coexpressed in COS-7 cells with a peroxisome-targeting  
795 sequence (PEX3) fused to monomeric red fluorescent protein (mRFP) and an FKBP domain  
796 (PEX-mRFP-FKBP). Addition of rapamycin (+Rap) causes heterodimerization of the FRB and

797 FKBP domains and recruitment of motors to the peroxisome membrane. Recruitment of active  
798 motors drives peroxisome dispersion to the cell periphery. (B) Representative images of  
799 peroxisome dispersion before (-Rap) and after (+Rap) recruitment of WT or mutant motors to the  
800 peroxisome surface. Blue lines indicate the nucleus and periphery of each cell. Blue arrowheads  
801 indicate peroxisomes. Scale bar, 10  $\mu\text{m}$ . Percentages in the upper right corner indicate the  
802 percent of cells with the indicated dispersion phenotype: black: clustered peroxisomes; dark gray:  
803 partially dispersed peroxisomes; light gray: diffusely dispersed peroxisomes; white: peripherally  
804 dispersed peroxisomes. (C) Qualitative analysis of peroxisome dispersion. Cells were scored as  
805 clustered (black), partially dispersed (dark grey), diffusely dispersed (light grey), or peripherally  
806 dispersed (white). The phenotypes of  $N \geq 43$  cells across three experiments were combined into  
807 a stacked bar plot for each construct at each time point.

## 808 REFERENCES

- 809 1. Hirokawa N, Noda Y, Tanaka Y, Niwa S. Kinesin superfamily motor proteins and intracellular  
810 transport. *Nat Rev Mol Cell Biol.* 2009;10(10):682-96.
- 811 2. Siddiqui N, Straube A. Intracellular Cargo Transport by Kinesin-3 Motors. *Biochemistry*  
812 (Mosc). 2017;82(7):803-15.
- 813 3. Gabrych DR, Lau VZ, Niwa S, Silverman MA. Going Too Far Is the Same as Falling  
814 Short(dagger): Kinesin-3 Family Members in Hereditary Spastic Paraplegia. *Front Cell*  
815 *Neurosci.* 2019;13:419.
- 816 4. Barkus RV, Klyachko O, Horiuchi D, Dickson BJ, Saxton WM. Identification of an axonal  
817 kinesin-3 motor for fast anterograde vesicle transport that facilitates retrograde transport  
818 of neuropeptides. *Mol Biol Cell.* 2008;19(1):274-83.
- 819 5. Hall DH, Hedgecock EM. Kinesin-related gene *unc-104* is required for axonal transport of  
820 synaptic vesicles in *C. elegans*. *Cell.* 1991;65(5):837-47.
- 821 6. Lo KY, Kuzmin A, Unger SM, Petersen JD, Silverman MA. KIF1A is the primary anterograde  
822 motor protein required for the axonal transport of dense-core vesicles in cultured  
823 hippocampal neurons. *Neurosci Lett.* 2011;491(3):168-73.
- 824 7. Okada Y, Yamazaki H, Sekine-Aizawa Y, Hirokawa N. The neuron-specific kinesin  
825 superfamily protein KIF1A is a unique monomeric motor for anterograde axonal transport  
826 of synaptic vesicle precursors. *Cell.* 1995;81(5):769-80.
- 827 8. Yonekawa Y, Harada A, Okada Y, Funakoshi T, Kanai Y, Takei Y, et al. Defect in synaptic  
828 vesicle precursor transport and neuronal cell death in KIF1A motor protein-deficient mice.  
829 *J Cell Biol.* 1998;141(2):431-41.
- 830 9. Zahn TR, Angleson JK, MacMorris MA, Domke E, Hutton JF, Schwartz C, et al. Dense core  
831 vesicle dynamics in *Caenorhabditis elegans* neurons and the role of kinesin UNC-104.  
832 *Traffic.* 2004;5(7):544-59.
- 833 10. Eggermann K, Gess B, Hausler M, Weis J, Hahn A, Kurth I. Hereditary Neuropathies. *Dtsch*  
834 *Arztebl Int.* 2018;115(6):91-7.
- 835 11. Guo Y, Chen Y, Yang M, Xu X, Lin Z, Ma J, et al. A Rare KIF1A Missense Mutation Enhances  
836 Synaptic Function and Increases Seizure Activity. *Front Genet.* 2020;11:61.
- 837 12. Martin PB, Hicks AN, Holbrook SE, Cox GA. Overlapping spectrums: The clinicogenetic  
838 commonalities between Charcot-Marie-Tooth and other neurodegenerative diseases.  
839 *Brain Res.* 2020;1727:146532.
- 840 13. Nemani T, Steel D, Kaliakatsos M, DeVile C, Ververi A, Scott R, et al. KIF1A-related disorders  
841 in children: A wide spectrum of central and peripheral nervous system involvement. *J*  
842 *Peripher Nerv Syst.* 2020; .
- 843 14. Samanta D, Gokden M. PEHO syndrome: KIF1A mutation and decreased activity of  
844 mitochondrial respiratory chain complex. *J Clin Neurosci.* 2019;61:298-301.
- 845 15. Wang J, Zhang Q, Chen Y, Yu S, Wu X, Bao X. Rett and Rett-like syndrome: Expanding the  
846 genetic spectrum to KIF1A and GRIN1 gene. *Mol Genet Genomic Med.* 2019;7(11):e968.
- 847 16. Hammond JW, Cai D, Blasius TL, Li Z, Jiang Y, Jih GT, et al. Mammalian Kinesin-3 motors  
848 are dimeric in vivo and move by processive motility upon release of autoinhibition. *PLoS*  
849 *Biol.* 2009;7(3):e72.
- 850 17. Scarabelli G, Soppina V, Yao XQ, Atherton J, Moores CA, Verhey KJ, et al. Mapping the  
851 Processivity Determinants of the Kinesin-3 Motor Domain. *Biophys J.* 2015;109(8):1537-  
852 40.
- 853 18. Soppina V, Norris SR, Dizaji AS, Kortus M, Veatch S, Peckham M, et al. Dimerization of  
854 mammalian kinesin-3 motors results in superprocessive motion. *Proc Natl Acad Sci U S*  
855 *A.* 2014;111(15):5562-7.
- 856 19. Svoboda K, Block SM. Force and velocity measured for single kinesin molecules. *Cell.*  
857 1994;77(5):773-84.

- 858 20. Asbury CL, Fehr AN, Block SM. Kinesin moves by an asymmetric hand-over-hand  
859 mechanism. *Science*. 2003;302(5653):2130-4.
- 860 21. Guydosh NR, Block SM. Direct observation of the binding state of the kinesin head to the  
861 microtubule. *Nature*. 2009;461(7260):125-8.
- 862 22. Hwang W, Karplus M. Structural basis for power stroke vs. Brownian ratchet mechanisms of  
863 motor proteins. *Proc Natl Acad Sci U S A*. 2019;116(40):19777-85.
- 864 23. Ramaiya A, Roy B, Bugiel M, Schaffer E. Kinesin rotates unidirectionally and generates torque  
865 while walking on microtubules. *Proc Natl Acad Sci U S A*. 2017;114(41):10894-9.
- 866 24. Brenner S, Berger F, Rao L, Nicholas MP, Gennerich A. Force production of human  
867 cytoplasmic dynein is limited by its processivity. *Sci Adv*. 2020;6(15):eaaz4295.
- 868 25. Case RB, Rice S, Hart CL, Ly B, Vale RD. Role of the kinesin neck linker and catalytic core  
869 in microtubule-based motility. *Curr Biol*. 2000;10(3):157-60.
- 870 26. Hwang W, Lang MJ, Karplus M. Kinesin motility is driven by subdomain dynamics. *Elife*.  
871 2017;6.
- 872 27. Khalil AS, Appleyard DC, Labno AK, Georges A, Karplus M, Belcher AM, et al. Kinesin's cover-  
873 neck bundle folds forward to generate force. *Proc Natl Acad Sci U S A*.  
874 2008;105(49):19247-52.
- 875 28. Rice S, Lin AW, Safer D, Hart CL, Naber N, Carragher BO, et al. A structural change in the  
876 kinesin motor protein that drives motility. *Nature*. 1999;402(6763):778-84.
- 877 29. Hwang W, Lang MJ, Karplus M. Force generation in kinesin hinges on cover-neck bundle  
878 formation. *Structure*. 2008;16(1):62-71.
- 879 30. Atherton J, Farabella I, Yu IM, Rosenfeld SS, Houdusse A, Topf M, et al. Conserved  
880 mechanisms of microtubule-stimulated ADP release, ATP binding, and force generation  
881 in transport kinesins. *Elife*. 2014;3:e03680.
- 882 31. Atherton J, Yu IM, Cook A, Muretta JM, Joseph A, Major J, et al. The divergent mitotic kinesin  
883 MKLP2 exhibits atypical structure and mechanochemistry. *Elife*. 2017;6.
- 884 32. Goulet A, Behnke-Parks WM, Sindelar CV, Major J, Rosenfeld SS, Moores CA. The structural  
885 basis of force generation by the mitotic motor kinesin-5. *J Biol Chem*. 2012;287(53):44654-  
886 66.
- 887 33. Goulet A, Major J, Jun Y, Gross SP, Rosenfeld SS, Moores CA. Comprehensive structural  
888 model of the mechanochemical cycle of a mitotic motor highlights molecular adaptations  
889 in the kinesin family. *Proc Natl Acad Sci U S A*. 2014;111(5):1837-42.
- 890 34. Hesse WR, Steiner M, Wohlever ML, Kamm RD, Hwang W, Lang MJ. Modular aspects of  
891 kinesin force generation machinery. *Biophys J*. 2013;104(9):1969-78.
- 892 35. von Loeffelholz O, Moores CA. Cryo-EM structure of the *Ustilago maydis* kinesin-5 motor  
893 domain bound to microtubules. *J Struct Biol*. 2019;207(3):312-6.
- 894 36. Budaitis BG, Jariwala S, Reinemann DN, Schimert KI, Scarabelli G, Grant BJ, et al. Neck  
895 linker docking is critical for Kinesin-1 force generation in cells but at a cost to motor speed  
896 and processivity. *Elife*. 2019;8.
- 897 37. Nitta R, Okada Y, Hirokawa N. Structural model for strain-dependent microtubule activation  
898 of Mg-ADP release from kinesin. *Nat Struct Mol Biol*. 2008;15(10):1067-75.
- 899 38. Ren J, Zhang Y, Wang S, Huo L, Lou J, Feng W. Structural Delineation of the Neck Linker of  
900 Kinesin-3 for Processive Movement. *J Mol Biol*. 2018;430(14):2030-41.
- 901 39. Arpag G, Norris SR, Mousavi SI, Soppina V, Verhey KJ, Hancock WO, et al. Motor Dynamics  
902 Underlying Cargo Transport by Pairs of Kinesin-1 and Kinesin-3 Motors. *Biophys J*.  
903 2019;116(6):1115-26.
- 904 40. Arpag G, Shastry S, Hancock WO, Tuzel E. Transport by populations of fast and slow kinesins  
905 uncovers novel family-dependent motor characteristics important for in vivo function.  
906 *Biophys J*. 2014;107(8):1896-904.

- 907 41. Norris SR, Soppina V, Dizaji AS, Schimert KI, Sept D, Cai D, et al. A method for multiprotein  
908 assembly in cells reveals independent action of kinesins in complex. *J Cell Biol.*  
909 2014;207(3):393-406.
- 910 42. Tomishige M, Klopfenstein DR, Vale RD. Conversion of Unc104/KIF1A kinesin into a  
911 processive motor after dimerization. *Science.* 2002;297(5590):2263-7.
- 912 43. Iqbal Z, Rydning SL, Wedding IM, Koht J, Pihlstrom L, Rengmark AH, et al. Targeted high  
913 throughput sequencing in hereditary ataxia and spastic paraplegia. *PLoS One.*  
914 2017;12(3):e0174667.
- 915 44. ClinVar; [VCV000224157.1] [Internet]. [cited April 8, 2020]. Available from:  
916 <https://www.ncbi.nlm.nih.gov/clinvar/variation/VCV000224157.1>
- 917 45. Richard J, Kim ED, Nguyen H, Kim CD, Kim S. Allosteric Wiring Map for Kinesin Energy  
918 Transduction and Its Evolution. *J Biol Chem.* 2016;291(40):20932-45.
- 919 46. Rao L, Berger F, Nicholas MP, Gennerich A. Molecular mechanism of cytoplasmic dynein  
920 tension sensing. *Nat Commun.* 2019;10(1):3332.
- 921 47. Nicholas MP, Hook P, Brenner S, Wynne CL, Vallee RB, Gennerich A. Control of cytoplasmic  
922 dynein force production and processivity by its C-terminal domain. *Nat Commun.*  
923 2015;6:6206.
- 924 48. Soppina V, Verhey KJ. The family-specific K-loop influences the microtubule on-rate but not  
925 the superprocessivity of kinesin-3 motors. *Mol Biol Cell.* 2014;25(14):2161-70.
- 926 49. Cao L, Wang W, Jiang Q, Wang C, Knossow M, Gigant B. The structure of apo-kinesin bound  
927 to tubulin links the nucleotide cycle to movement. *Nat Commun.* 2014;5:5364.
- 928 50. Shang Z, Zhou K, Xu C, Csencsits R, Cochran JC, Sindelar CV. High-resolution structures of  
929 kinesin on microtubules provide a basis for nucleotide-gated force-generation. *Elife.*  
930 2014;3:e04686.
- 931 51. Kikkawa M, Sablin EP, Okada Y, Yajima H, Fletterick RJ, Hirokawa N. Switch-based  
932 mechanism of kinesin motors. *Nature.* 2001;411(6836):439-45.
- 933 52. Rao L, Romes EM, Nicholas MP, Brenner S, Tripathy A, Gennerich A, et al. The yeast dynein  
934 Dyn2-Pac11 complex is a dynein dimerization/processivity factor: structural and single-  
935 molecule characterization. *Mol Biol Cell.* 2013;24(15):2362-77.
- 936 53. Kapitein LC, Schlager MA, van der Zwan WA, Wulf PS, Keijzer N, Hoogenraad CC. Probing  
937 intracellular motor protein activity using an inducible cargo trafficking assay. *Biophys J.*  
938 2010;99(7):2143-52.
- 939 54. Schimert KI, Budaitis BG, Reinemann DN, Lang MJ, Verhey KJ. Intracellular cargo transport  
940 by single-headed kinesin motors. *Proc Natl Acad Sci U S A.* 2019;116(13):6152-61.
- 941 55. Efremov AK, Radhakrishnan A, Tsao DS, Bookwalter CS, Trybus KM, Diehl MR. Delineating  
942 cooperative responses of processive motors in living cells. *Proc Natl Acad Sci U S A.*  
943 2014;111(3):E334-43.
- 944 56. Lessard DV, Zinder OJ, Hotta T, Verhey KJ, Ohi R, Berger CL. Polyglutamylation of tubulin's  
945 C-terminal tail controls pausing and motility of kinesin-3 family member KIF1A. *J Biol*  
946 *Chem.* 2019;294(16):6353-63.
- 947 57. Rogers KR, Weiss S, Crevel I, Brophy PJ, Geeves M, Cross R. KIF1D is a fast non-processive  
948 kinesin that demonstrates novel K-loop-dependent mechanochemistry. *EMBO J.*  
949 2001;20(18):5101-13.
- 950 58. Siddiqui N, Zwetsloot AJ, Bachmann A, Roth D, Hussain H, Brandt J, et al. PTPN21 and  
951 Hook3 relieve KIF1C autoinhibition and activate intracellular transport. *Nat Commun.*  
952 2019;10(1):2693.
- 953 59. Carter NJ, Cross RA. Mechanics of the kinesin step. *Nature.* 2005;435(7040):308-12.
- 954 60. Andreasson JO, Shastry S, Hancock WO, Block SM. The Mechanochemical Cycle of  
955 Mammalian Kinesin-2 KIF3A/B under Load. *Curr Biol.* 2015;25(9):1166-75.

- 956 61. Milic B, Andreasson JOL, Hogan DW, Block SM. Intraflagellar transport velocity is governed  
957 by the number of active KIF17 and KIF3AB motors and their motility properties under load.  
958 Proc Natl Acad Sci U S A. 2017;114(33):E6830-E8.
- 959 62. Schroeder HW, 3rd, Hendricks AG, Ikeda K, Shuman H, Rodionov V, Ikebe M, et al. Force-  
960 dependent detachment of kinesin-2 biases track switching at cytoskeletal filament  
961 intersections. Biophys J. 2012;103(1):48-58.
- 962 63. Korneev MJ, Lakamper S, Schmidt CF. Load-dependent release limits the processive  
963 stepping of the tetrameric Eg5 motor. Eur Biophys J. 2007;36(6):675-81.
- 964 64. Shimamoto Y, Forth S, Kapoor TM. Measuring Pushing and Braking Forces Generated by  
965 Ensembles of Kinesin-5 Crosslinking Two Microtubules. Dev Cell. 2015;34(6):669-81.
- 966 65. Valentine MT, Block SM. Force and premature binding of ADP can regulate the processivity  
967 of individual Eg5 dimers. Biophys J. 2009;97(6):1671-7.
- 968 66. Valentine MT, Fordyce PM, Krzysiak TC, Gilbert SP, Block SM. Individual dimers of the mitotic  
969 kinesin motor Eg5 step processively and support substantial loads in vitro. Nat Cell Biol.  
970 2006;8(5):470-6.
- 971 67. Ren J, Wang S, Chen H, Wang W, Huo L, Feng W. Coiled-coil 1-mediated fastening of the  
972 neck and motor domains for kinesin-3 autoinhibition. Proc Natl Acad Sci U S A.  
973 2018;115(51):E11933-E42.
- 974 68. Hahlen K, Ebbing B, Reinders J, Mergler J, Sickmann A, Woehlke G. Feedback of the kinesin-  
975 1 neck-linker position on the catalytic site. J Biol Chem. 2006;281(27):18868-77.
- 976 69. Muretta JM, Jun Y, Gross SP, Major J, Thomas DD, Rosenfeld SS. The structural kinetics of  
977 switch-1 and the neck linker explain the functions of kinesin-1 and Eg5. Proc Natl Acad  
978 Sci U S A. 2015;112(48):E6606-13.
- 979 70. Chiba K, Takahashi H, Chen M, Obinata H, Arai S, Hashimoto K, et al. Disease-associated  
980 mutations hyperactivate KIF1A motility and anterograde axonal transport of synaptic  
981 vesicle precursors. Proc Natl Acad Sci U S A. 2019;116(37):18429-34.
- 982 71. Cheng L, Desai J, Miranda CJ, Duncan JS, Qiu W, Nugent AA, et al. Human CFEOM1  
983 mutations attenuate KIF21A autoinhibition and cause oculomotor axon stalling. Neuron.  
984 2014;82(2):334-49.
- 985 72. Imanishi M, Endres NF, Gennerich A, Vale RD. Autoinhibition regulates the motility of the *C.*  
986 *elegans* intraflagellar transport motor OSM-3. J Cell Biol. 2006;174(7):931-7.
- 987 73. Moua P, Fullerton D, Serbus LR, Warrior R, Saxton WM. Kinesin-1 tail autoregulation and  
988 microtubule-binding regions function in saltatory transport but not ooplasmic streaming.  
989 Development. 2011;138(6):1087-92.
- 990 74. van der Vaart B, van Riel WE, Doodhi H, Kevenaar JT, Katrukha EA, Gumy L, et al. CFEOM1-  
991 associated kinesin KIF21A is a cortical microtubule growth inhibitor. Dev Cell.  
992 2013;27(2):145-60.
- 993 75. Kelliher MT, Yue Y, Ng A, Kamiyama D, Huang B, Verhey KJ, et al. Autoinhibition of kinesin-  
994 1 is essential to the dendrite-specific localization of Golgi outposts. J Cell Biol.  
995 2018;217(7):2531-47.
- 996 76. Niwa S, Lipton DM, Morikawa M, Zhao C, Hirokawa N, Lu H, et al. Autoinhibition of a Neuronal  
997 Kinesin UNC-104/KIF1A Regulates the Size and Density of Synapses. Cell Rep.  
998 2016;16(8):2129-41.
- 999 77. Hayashi K, Hasegawa S, Sagawa T, Tasaki S, Niwa S. Non-invasive force measurement  
1000 reveals the number of active kinesins on a synaptic vesicle precursor in axonal transport  
1001 regulated by ARL-8. Phys Chem Chem Phys. 2018;20(5):3403-10.
- 1002 78. Hayashi K, Tsuchizawa Y, Iwaki M, Okada Y. Application of the fluctuation theorem for non-  
1003 invasive force measurement in living neuronal axons. Mol Biol Cell. 2018;mbcE18010022.
- 1004 79. Sali A, Blundell TL. Comparative protein modelling by satisfaction of spatial restraints. J Mol  
1005 Biol. 1993;234(3):779-815.



- 1006 80. Shen MY, Sali A. Statistical potential for assessment and prediction of protein structures.  
1007 Protein Sci. 2006;15(11):2507-24.
- 1008 81. Hornak V, Abel R, Okur A, Strockbine B, Roitberg A, Simmerling C. Comparison of multiple  
1009 Amber force fields and development of improved protein backbone parameters. Proteins.  
1010 2006;65(3):712-25.
- 1011 82. Meagher KL, Redman LT, Carlson HA. Development of polyphosphate parameters for use  
1012 with the AMBER force field. J Comput Chem. 2003;24(9):1016-25.
- 1013 83. Li H, Robertson AD, Jensen JH. Very fast empirical prediction and rationalization of protein  
1014 pKa values. Proteins. 2005;61(4):704-21.
- 1015 84. Skjaerven L, Yao XQ, Scarabelli G, Grant BJ. Integrating protein structural dynamics and  
1016 evolutionary analysis with Bio3D. BMC Bioinformatics. 2014;15:399.
- 1017 85. Muretta JM, Reddy BJN, Scarabelli G, Thompson AF, Jariwala S, Major J, et al. A  
1018 posttranslational modification of the mitotic kinesin Eg5 that enhances its  
1019 mechanochemical coupling and alters its mitotic function. Proc Natl Acad Sci U S A.  
1020 2018;115(8):E1779-E88.
- 1021 86. Engelke MF, Winding M, Yue Y, Shastry S, Teloni F, Reddy S, et al. Engineered kinesin motor  
1022 proteins amenable to small-molecule inhibition. Nat Commun. 2016;7:11159.
- 1023 87. Monroy BY, Sawyer DL, Ackermann BE, Borden MM, Tan TC, Ori-McKenney KM.  
1024 Competition between microtubule-associated proteins directs motor transport. Nat  
1025 Commun. 2018;9(1):1487.
- 1026 88. Mahamdeh M, Simmert S, Luchniak A, Schaffer E, Howard J. Label-free high-speed wide-  
1027 field imaging of single microtubules using interference reflection microscopy. J Microsc.  
1028 2018;272(1):60-6.  
1029

## SUPPLEMENTAL FIGURES

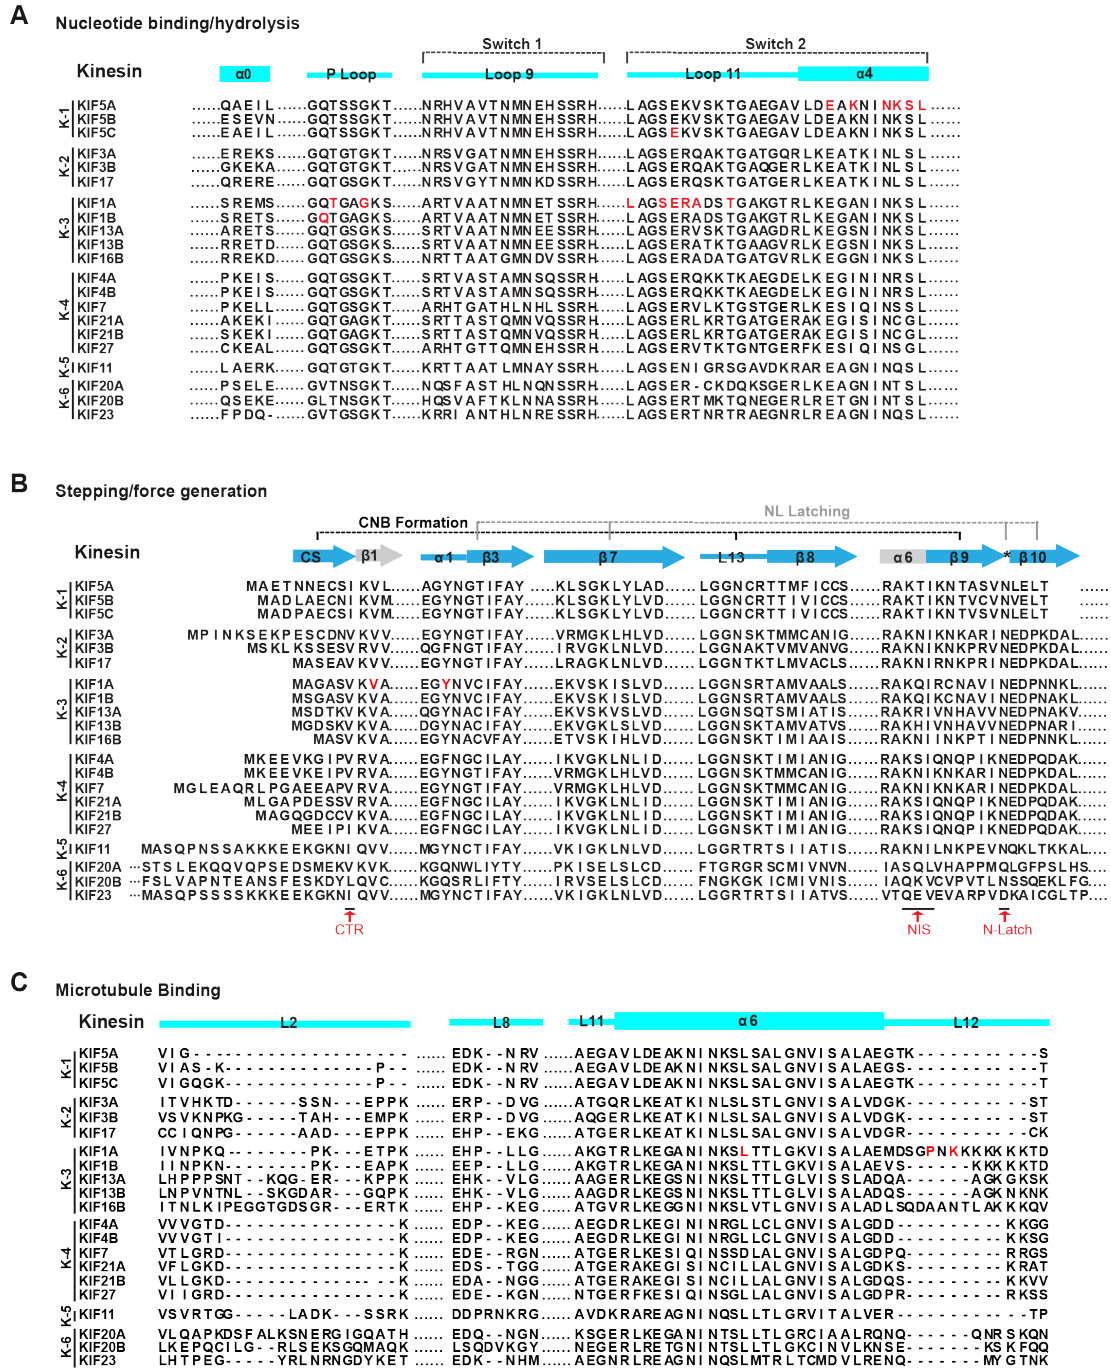

**Figure S1. Sequence alignment of functional elements of the kinesin motor domain across the kinesin superfamily.** (A-C) Alignment of the motor domain sequences from the indicated human members of the kinesin-1, -2, -3, -4, -5, -6, and -10 families. Secondary structural elements important for (A) MT binding, (B) nucleotide binding/hydrolysis, and (C) force generation/stepping are illustrated. Red text denotes identified mutations associated with neurodevelopmental and/or neurodegenerative disorders. CTR, C-terminal residue of the CS. NIS, NL initiation sequence. N-Latch, asparagine (N) latch.

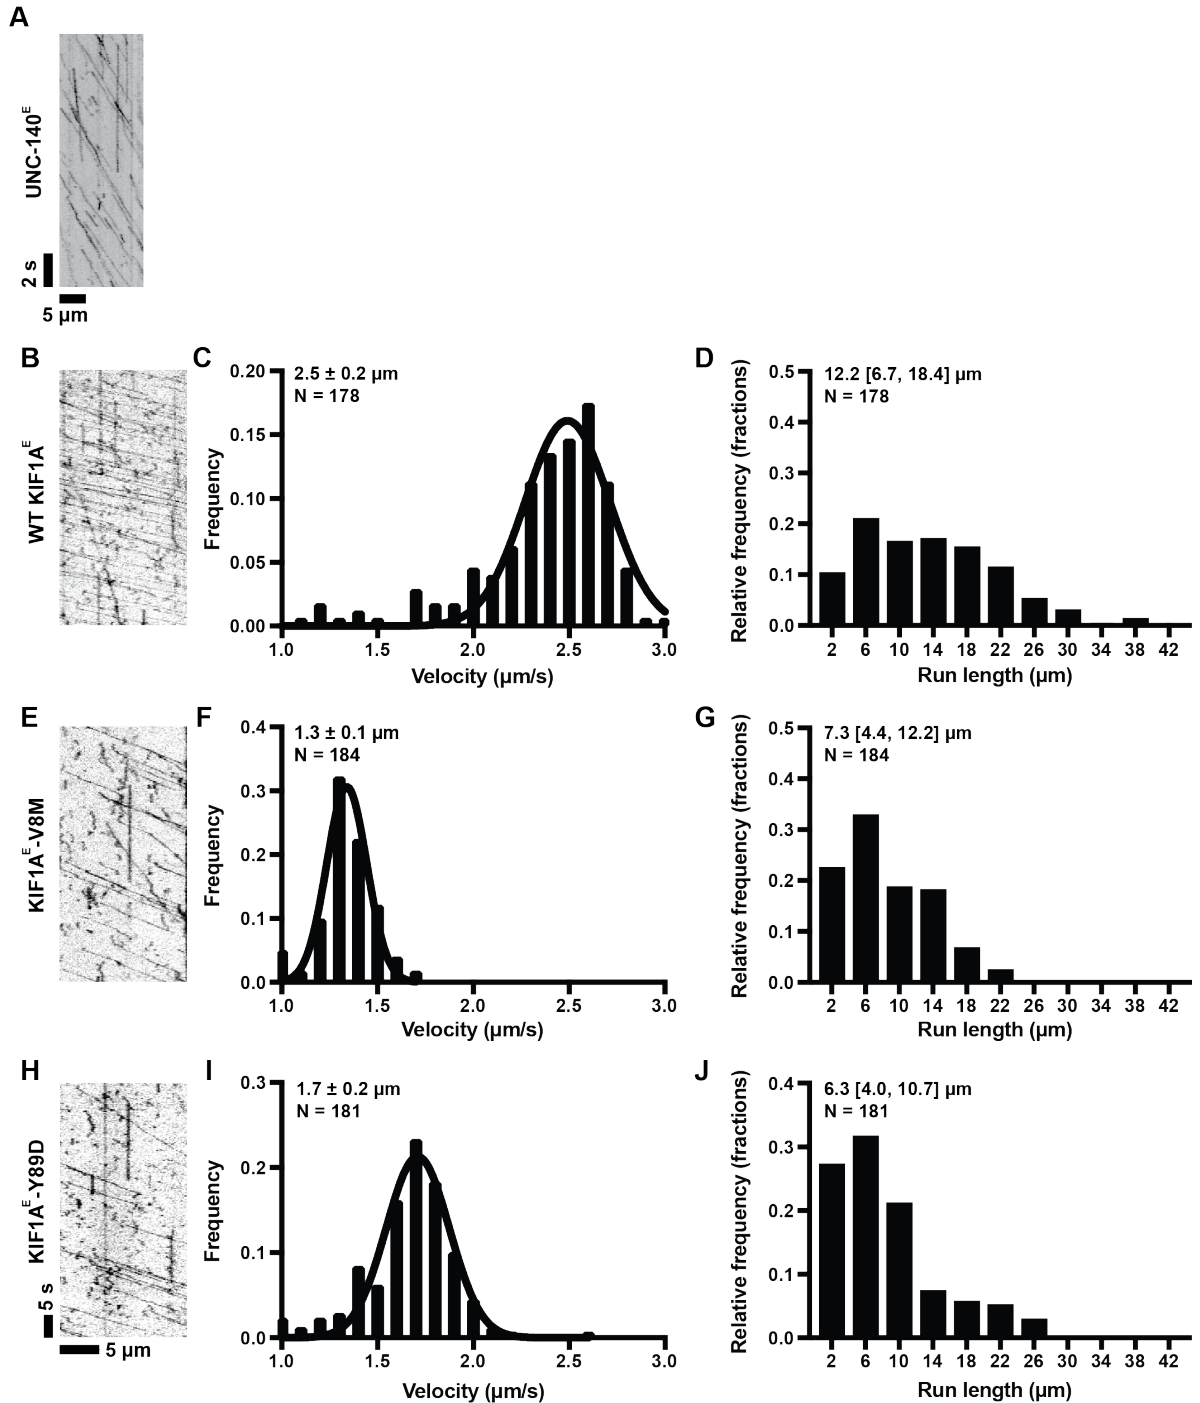

**Figure S2. Velocity and processivity of *E. coli*-expressed WT and mutant KIF1A.** (A) Example kymograph of UNC-140<sup>E</sup> purified from *E. coli* bacteria. (B-D) Example kymograph of WT KIF1A<sup>E</sup>. From kymographs, single-motor velocities (C) and run lengths (D) were determined. The mean values  $\pm$  SEM (for velocities) and the median with quartiles (for run lengths) are indicated on each graph. (E-G) As in C-D but for the KIF1A<sup>E</sup>-V8M mutant. (H-J) As in C-D but for the KIF1A<sup>E</sup>-Y89D mutant.

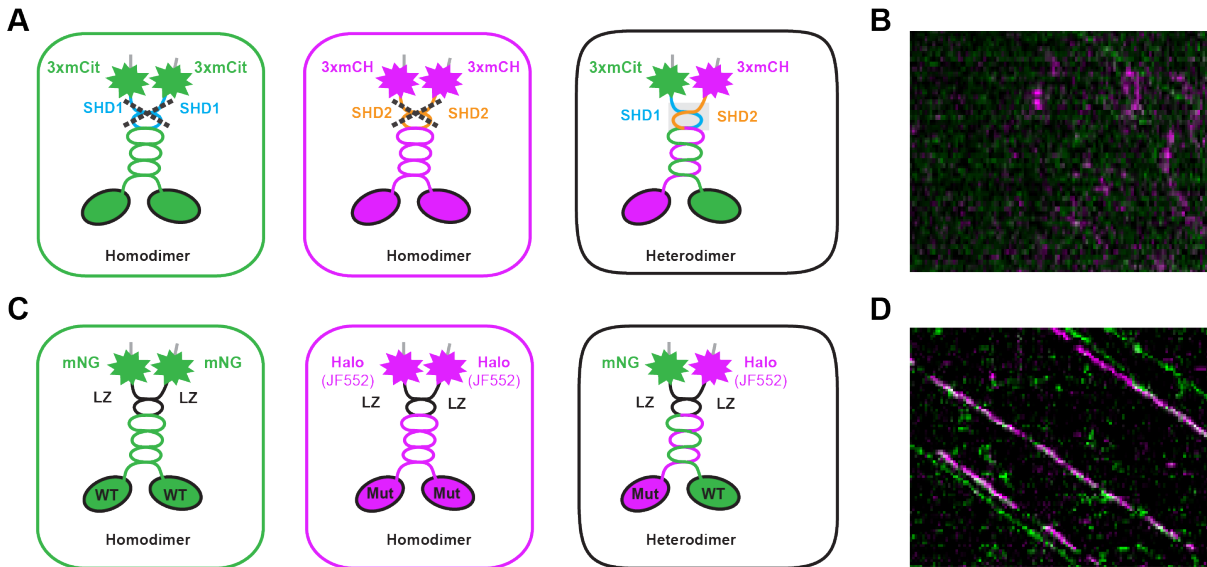

**Figure S3. Strategies for designing heterodimeric motors.** (A,B) Formation of heterodimeric motors using a synthetic heterodimerization (SHD) sequence. (A) SHD (Albracht et al., 2014 JBC) was fused to the C-terminus of KIF1A(1-393). Coiled-coil prediction software was used to ensure that the SHD sequences were placed in register with the native KIF1A heptad repeat (Marcoil). One KIF1A(1-393)-SHD sequence was fused to three tandem monomeric citrine fluorescent proteins [KIF1A(393)-SHD1-3xmCit] and the other was fused to three tandem monomeric Cherry proteins [KIF1A(393)-SHD2-3xmCH]. Unlike the leucine zipper sequence of GCN4, SHD1 and SHD2 sequences are not expected to homodimerize (left and middle) and instead are expected to form a heterodimer (right). To test this, lysates of COS-7 cells co-transfected with plasmids coding for KIF1A(393)-SHD1-3xmCit and KIF1A(393)-SHD2-3xmCH motors were subjected to single-molecule imaging using TIRF microscopy. (B) Representative kymograph of a TIRF single-molecule assay of lysates from COS-7 cells cotransfected with KIF1A(1-393)-SHD1-3xmCit and KIF1A(1-393)-SHD2-3xmCH plasmids. Time is displayed on the y-axis (bar, 4 s) and distance displayed on the x-axis (bar, 4  $\mu$ m). Very few heterodimeric (magenta/green) spots were detected. The few heterodimeric events observed were short and non-processive, unlike the fast, super-processive motility of stable dimeric KIF1A motors. (C,D) Formation of heterodimeric motors using a leucine zipper (LZ) sequence. (C) The LZ sequence of GCN4 was fused to the C-terminus of KIF1A(1-393) (Hammond 2009 PLoS Biol). Coiled-coil prediction software was used to ensure that the LZ sequences were placed in register with the native KIF1A heptad repeat (Marcoil). Motors were fused to either monomeric NeonGreen (mNG) or Halo-FLAG fluorescently tagged with JF552. Three populations of motors are expected in TIRF single-molecule assays: homodimeric Halo-FLAG motors, homodimeric mNG motors, and heterodimeric Halo-FLAG/mNG motors. (D) Representative kymograph of TIRF single-molecule assays of lysates from COS-7 cells cotransfected with KIF1A(1-393)-LZ-mNG and KIF1A(1-393)-LZ-Halo-FLAG. Time is displayed on the x-axis (bar, 4 s) and distance displayed on the y-axis (bar, 4  $\mu$ m). Heterodimeric motors (green/magenta) showed fast, superprocessive runs typical of KIF1A motors.

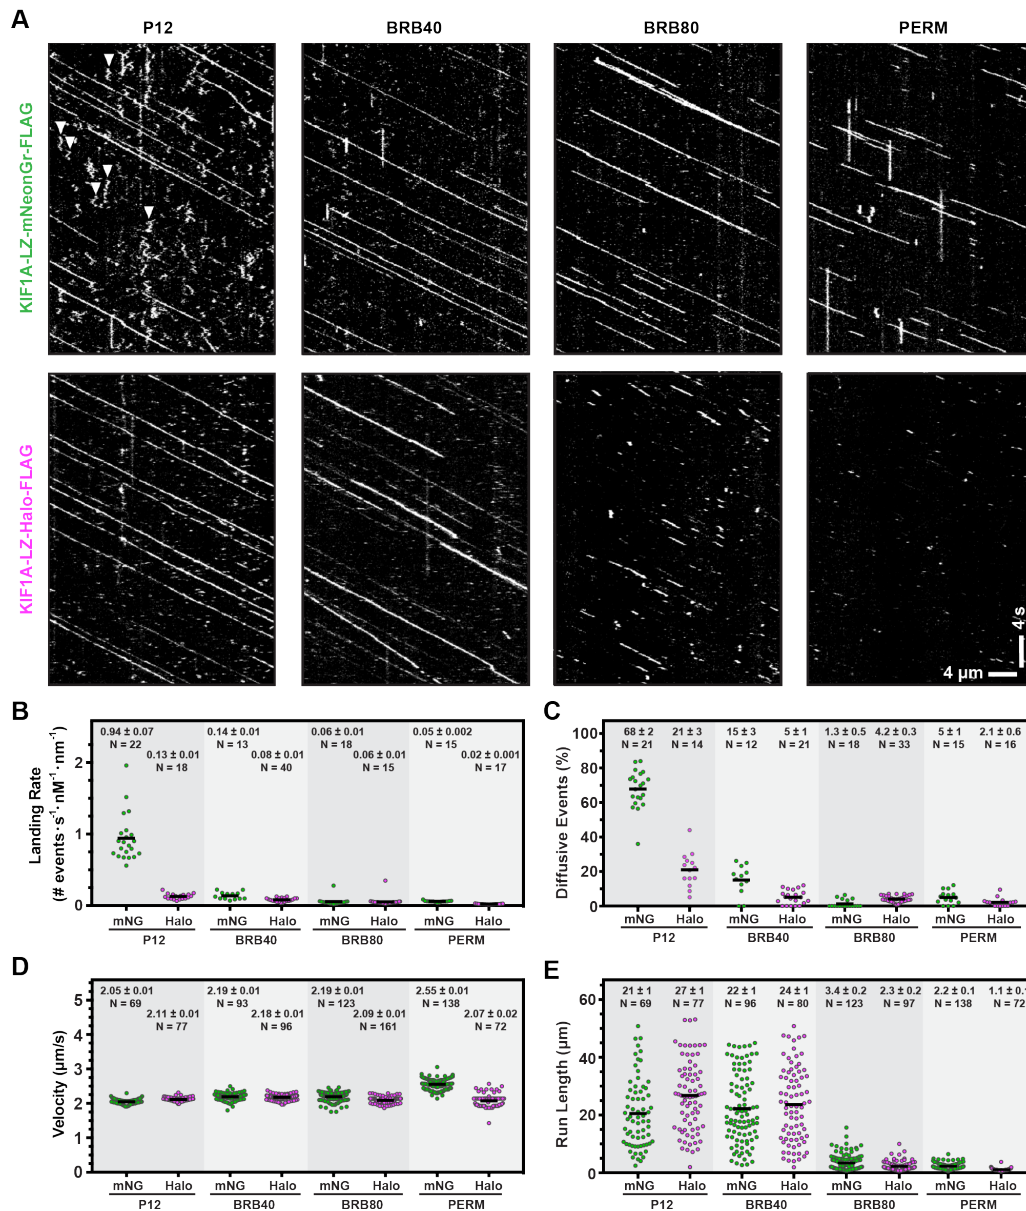

**Figure S4. Influence of fluorescence tag and buffer conditions on KIF1A motility.** (A) Motility properties of KIF1A motors dimerized by a leucine zipper sequence (LZ) and fused at their C-termini to monomeric NeonGreen (mNG) or Halo-FLAG/JF552. Motors in COS-7 lysates were analyzed in standard single-molecule motility assays using TIRF microscopy. Representative kymographs are shown with time displayed on the y-axis (bar, 4 s) and distance displayed on the x-axis (bar, 4  $\mu\text{m}$ ). White arrowheads indicate motility events scored as a diffusive. (B-E) Quantification of motility properties. From the kymographs, single-motor landing rates (B) [motility events (diffusive and processive) with dwell times longer than 400 ms], frequency of diffusive events (C) (net displacement <300 nm, dwell time >400ms, velocity (D), and run length (E) were determined and the data for each population is plotted as a dot plot. Each dot represents a single motor. Consistent with previous studies (Norris et al., 2015), buffer conditions had little effect on velocity but did affect the other parameters in a tag-dependent manner. Further experiments were carried out in BRB40 buffer.

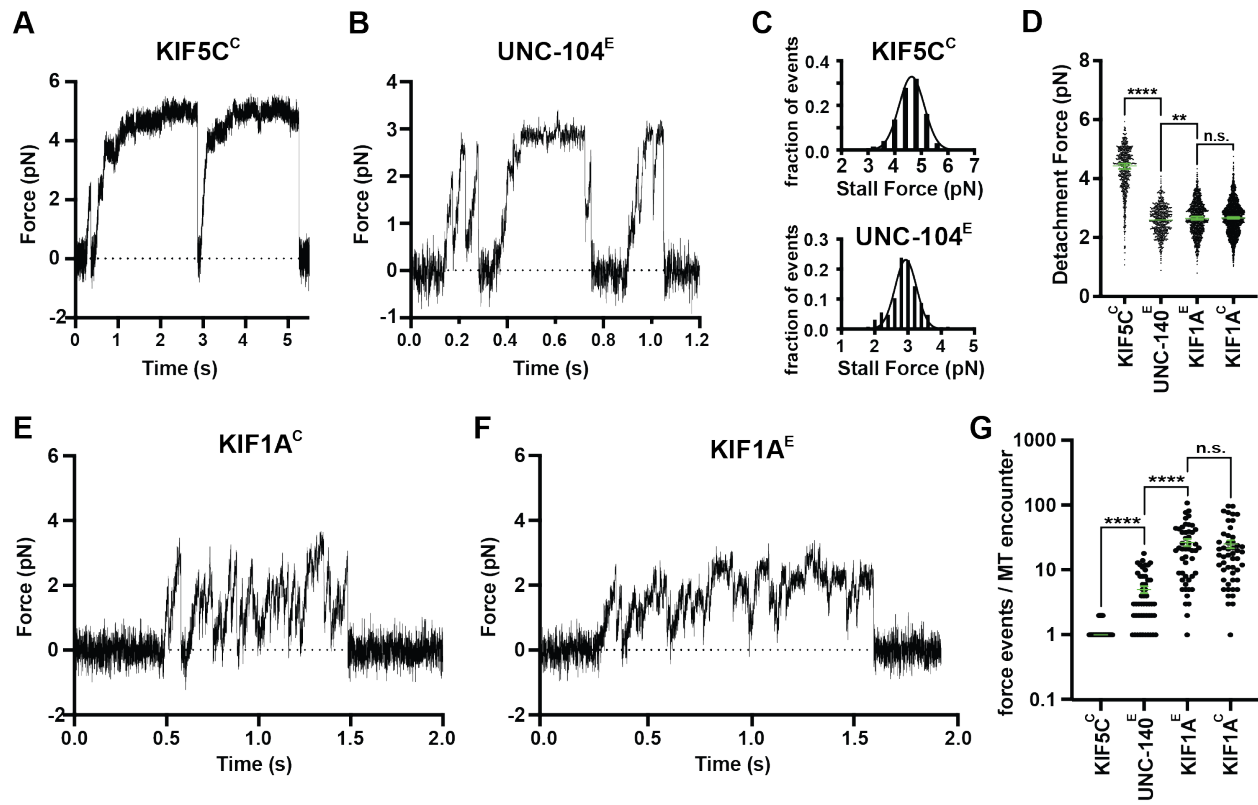

**Fig. 1**

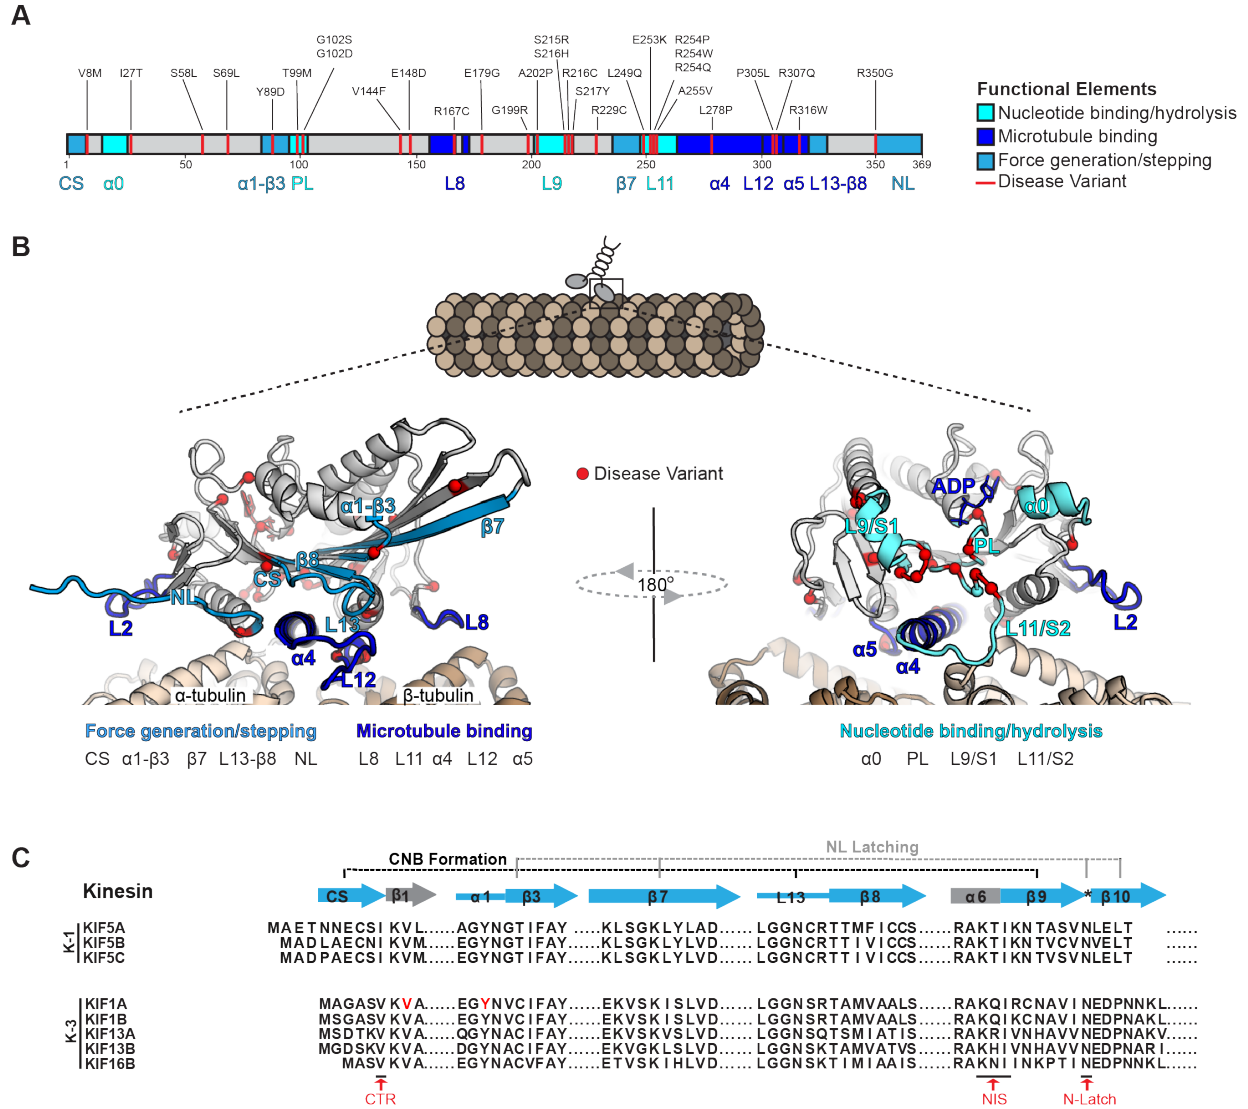

**Fig. 2**

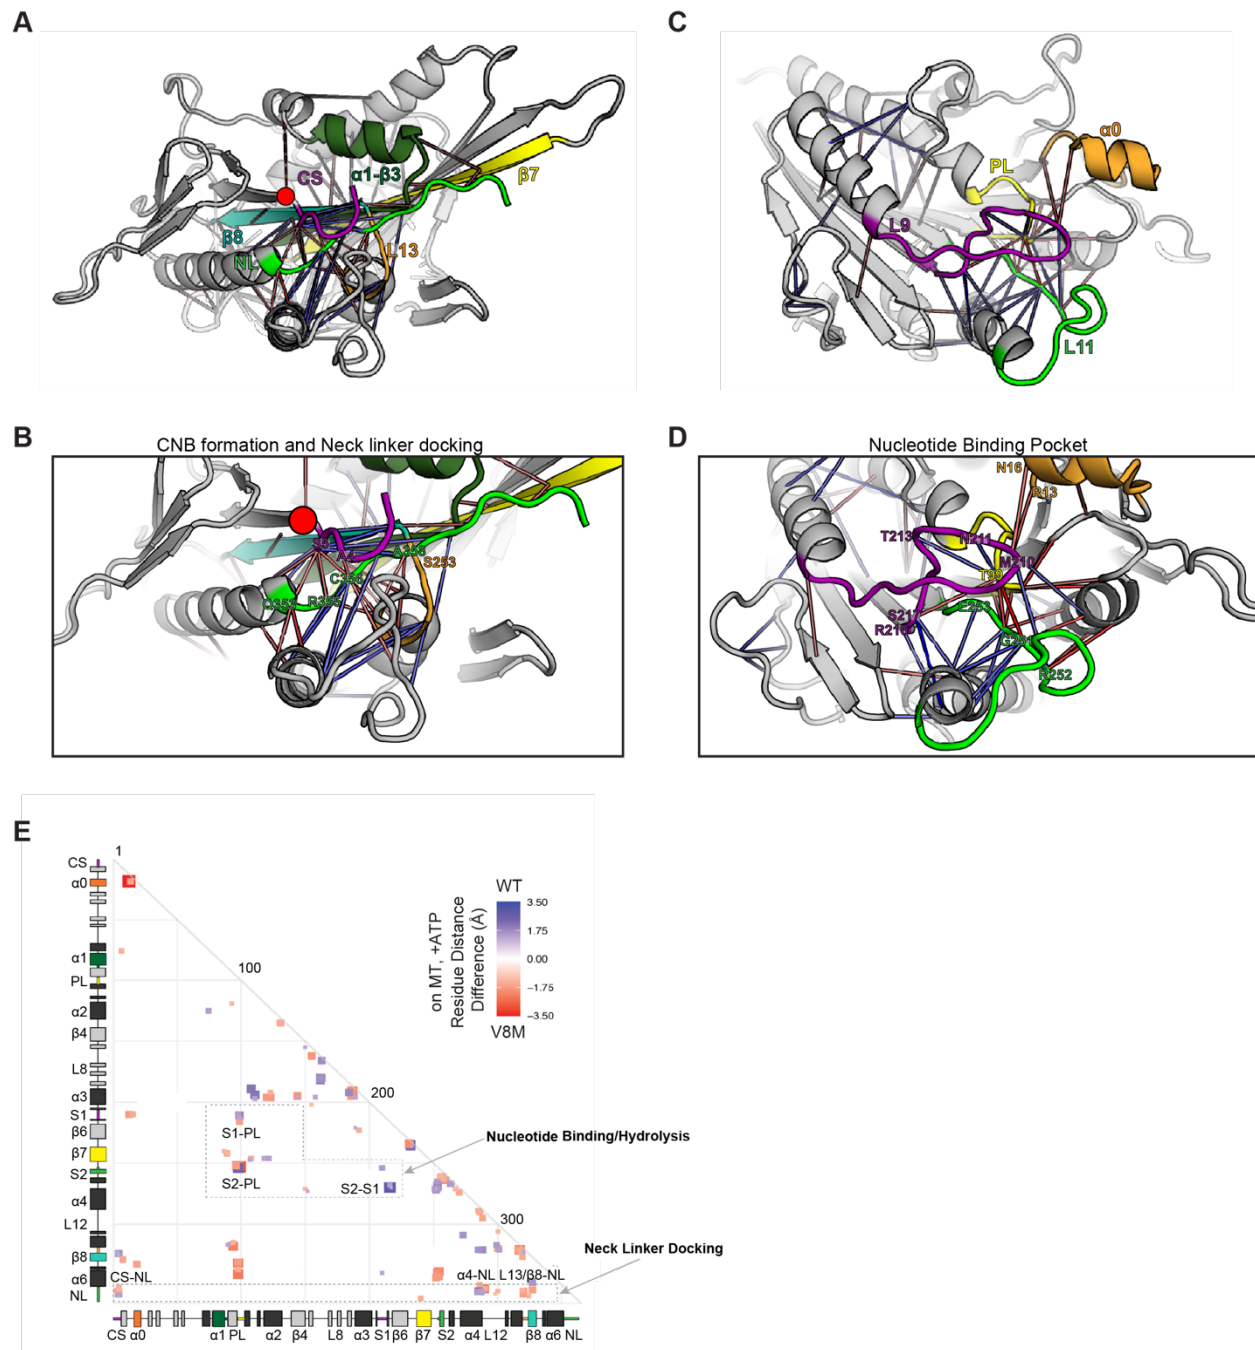

**Fig. 3**



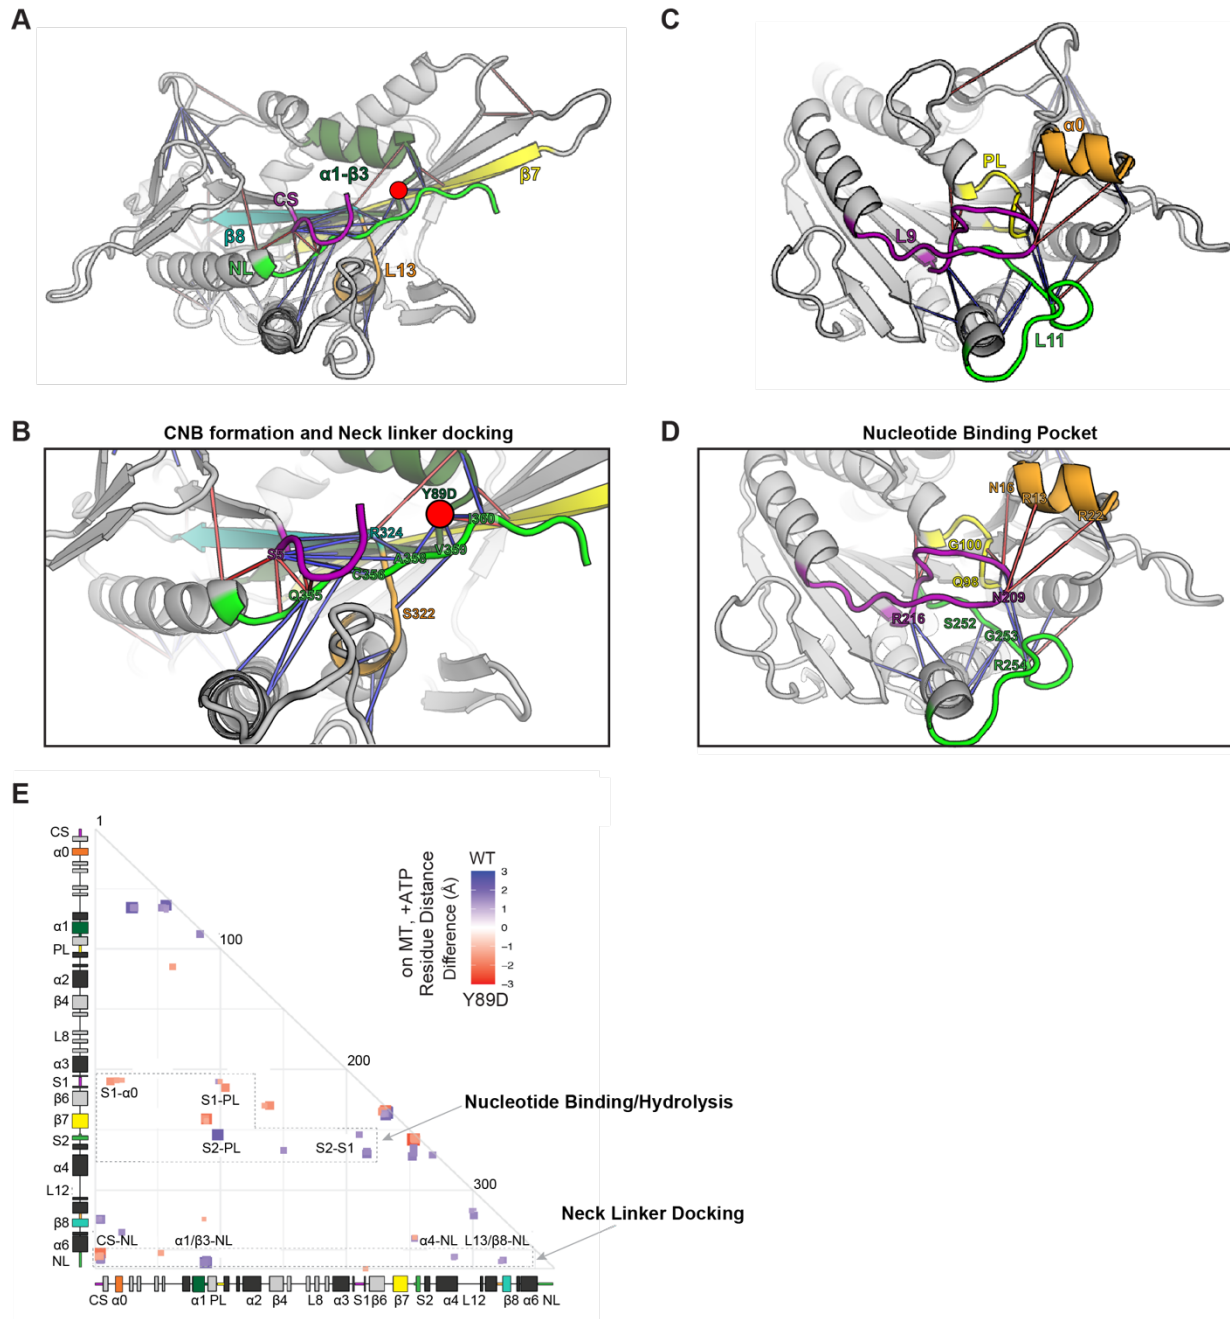

Fig. 4

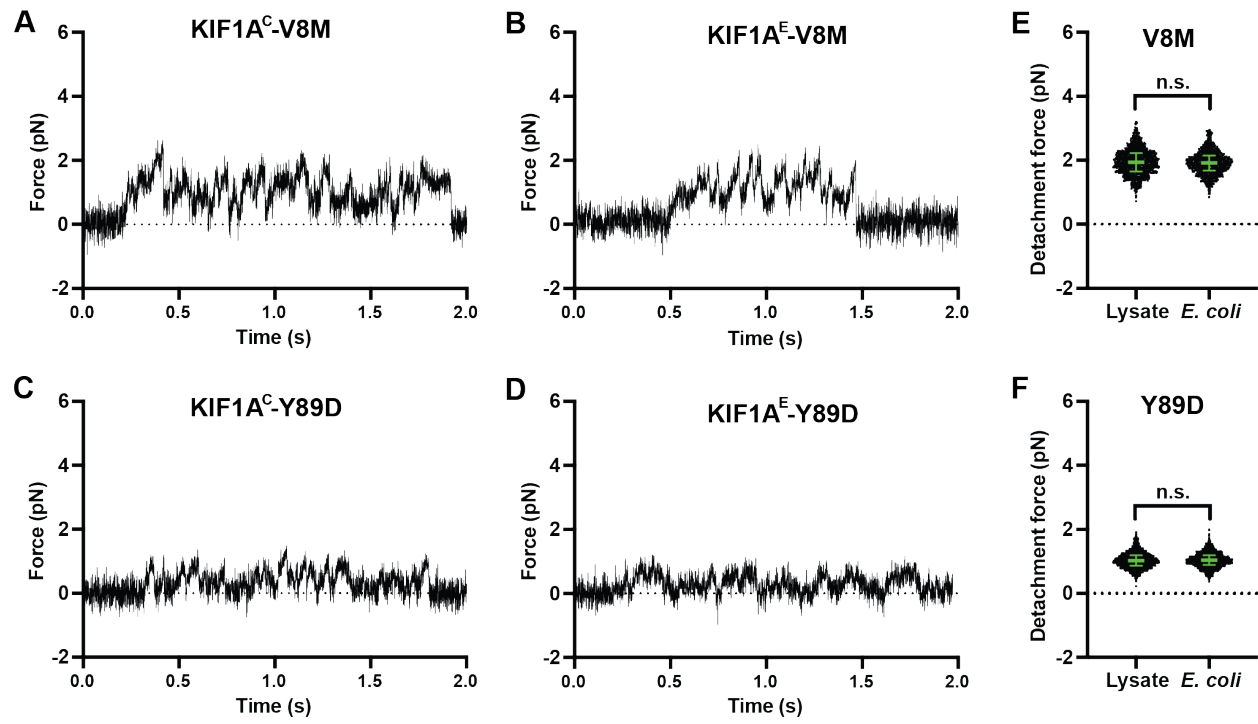

**Fig. 5**

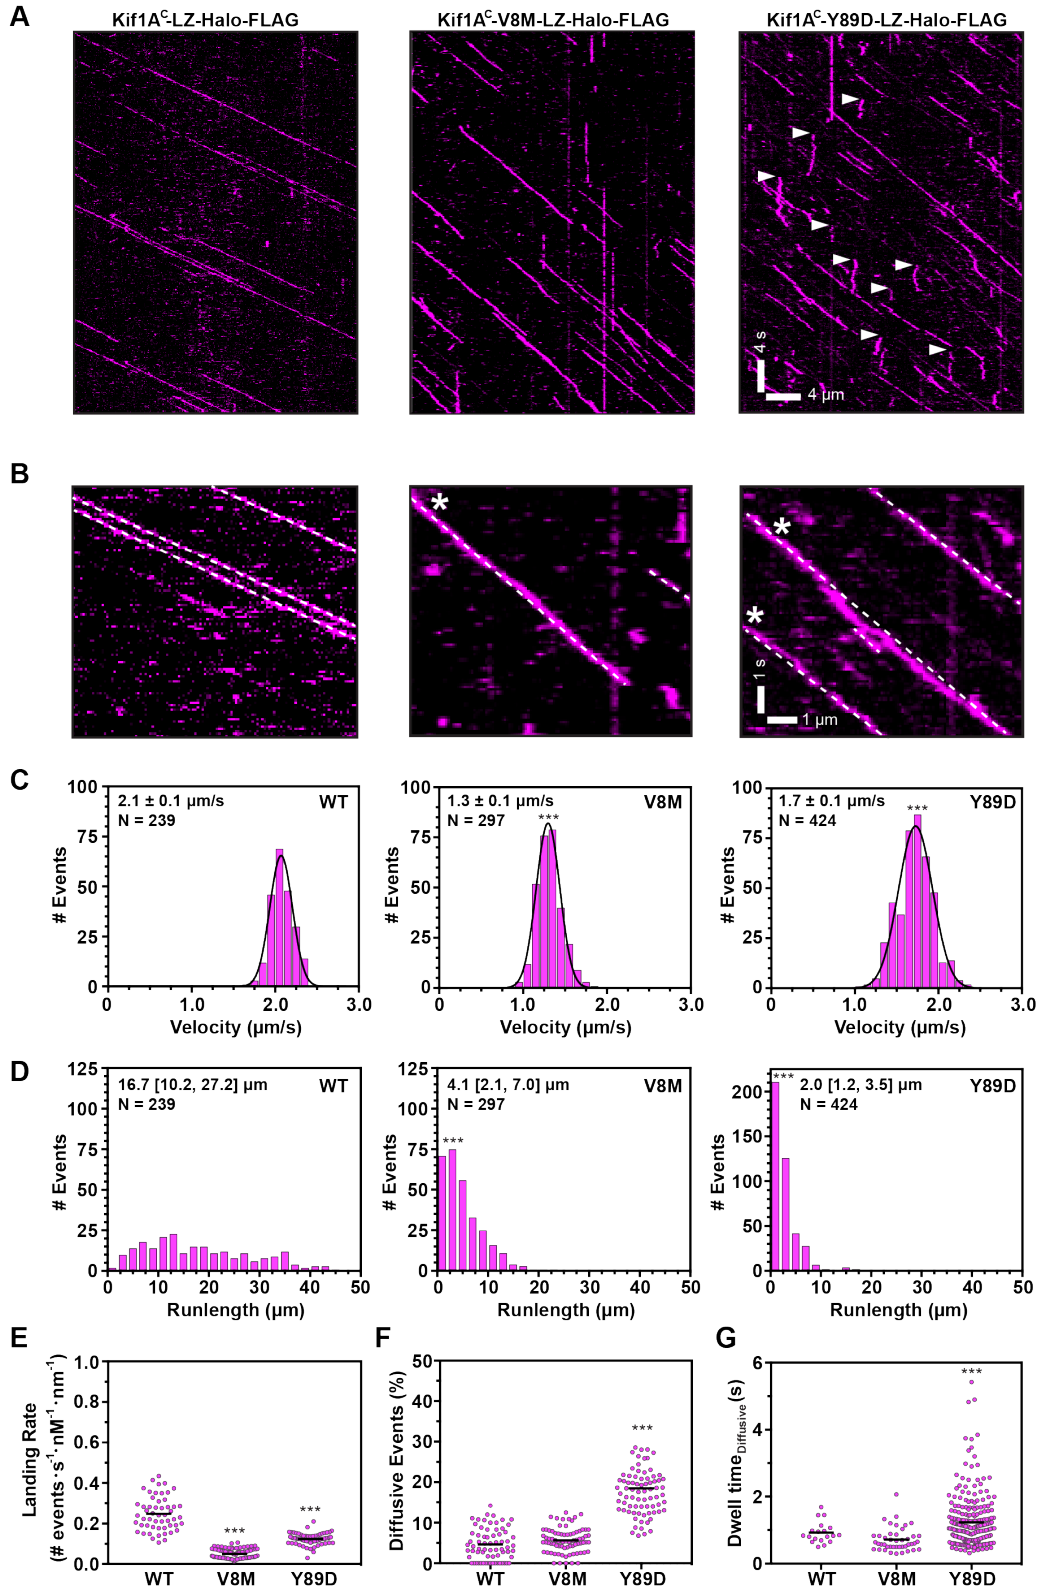

**Fig. 6**

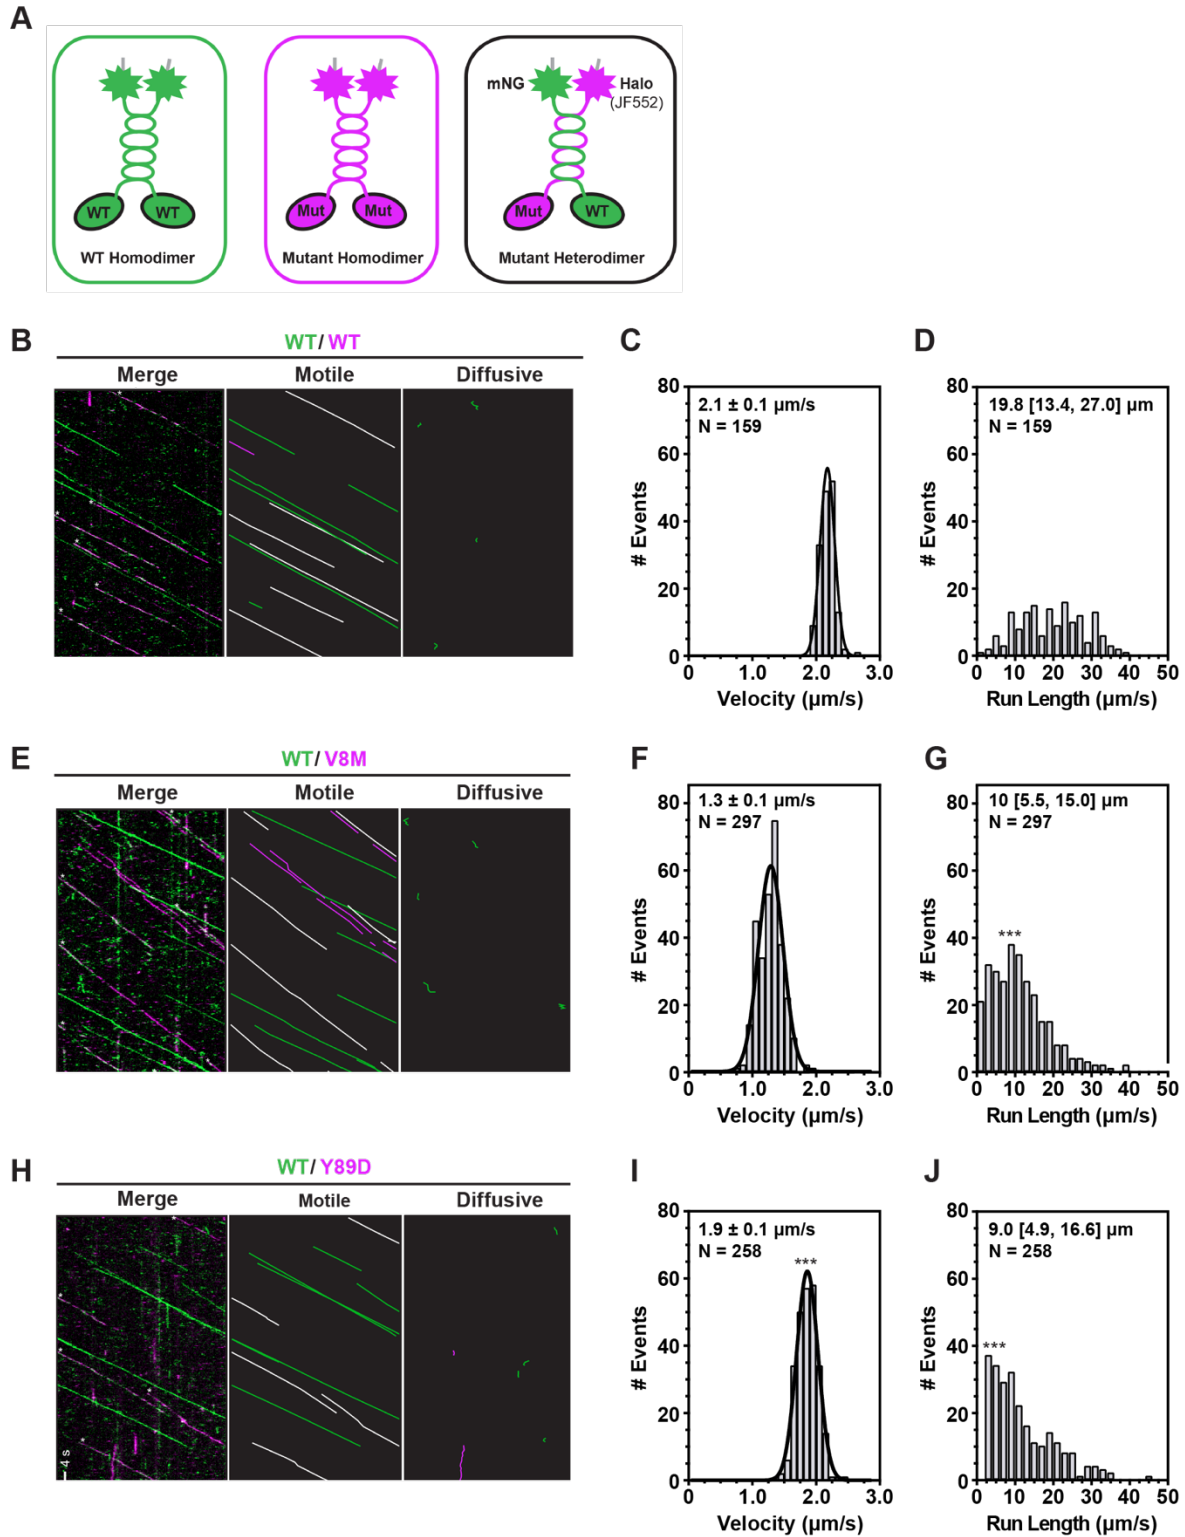

**Fig. 7**

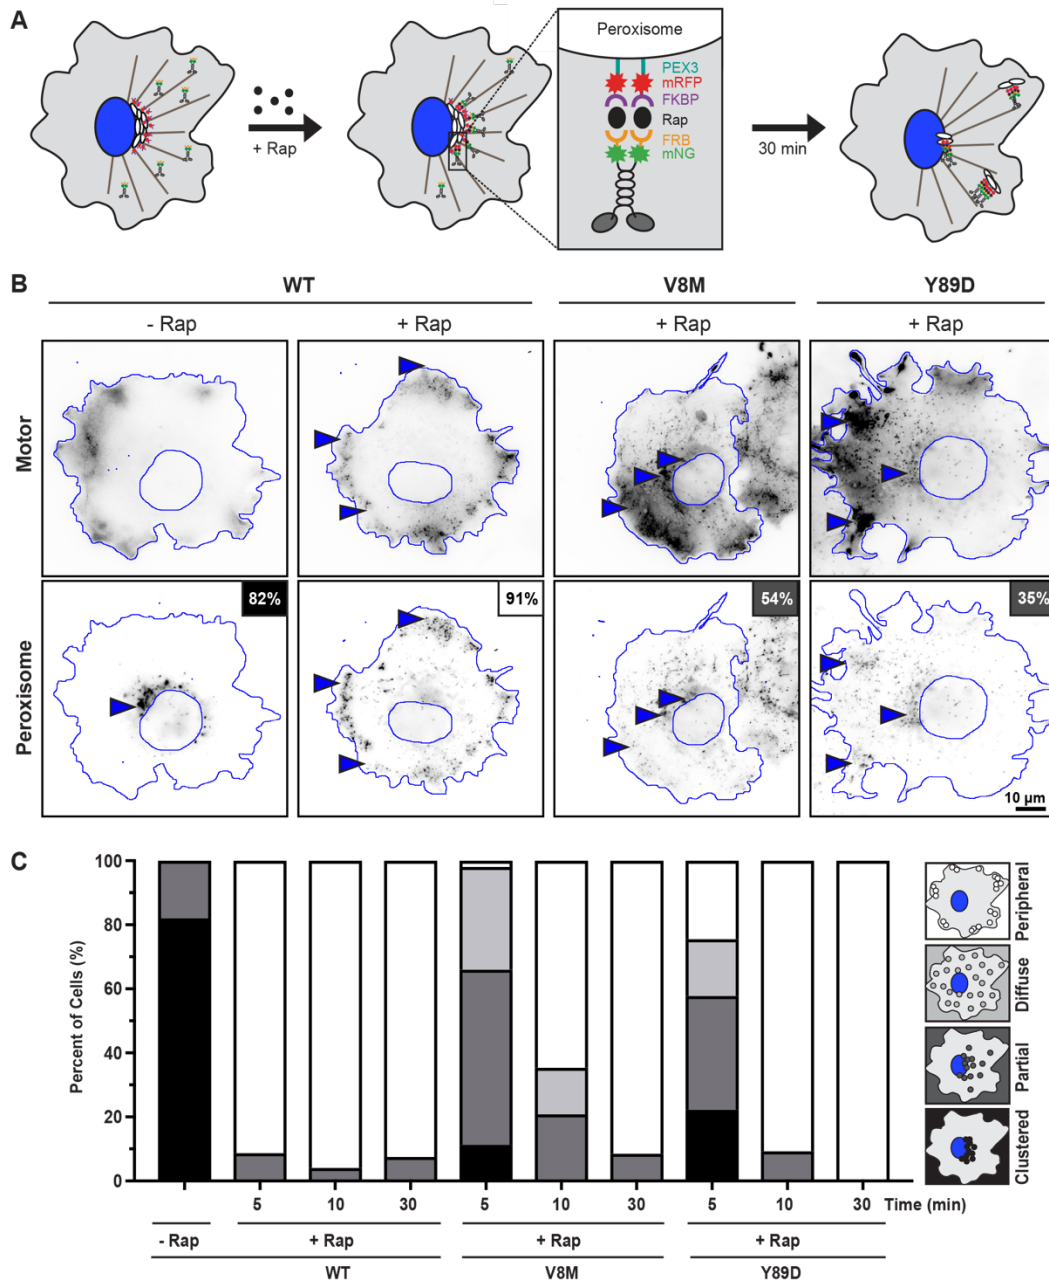

**Fig. 8**
